1  
2 **Mutations in a single signaling pathway allow growth**  
3 **on a different solvent than water**

4  
5 Caroline Kampmeyer<sup>1</sup>, Jens V. Johansen<sup>2</sup>, Christian Holmberg<sup>1</sup>, Magnus Karlson<sup>3</sup>,  
6 Sarah K. Gersing<sup>1</sup>, Heloisa N. Bordallo<sup>4</sup>, Birthe B. Kragelund<sup>1</sup>, Mathilde H. Lerche<sup>3</sup>,  
7 Isabelle Jourdain<sup>5</sup>, Jakob R. Winther<sup>1</sup> and Rasmus Hartmann-Petersen<sup>1,\*</sup>  
8

9 *Running title: The cellular response to solvent replacement*

10 *Keywords: D<sub>2</sub>O, deuterium oxide, yeast, cell stress, protein folding, cytokinesis, deuteration*

11  
12 1: The Linderstrøm-Lang Center, Department of Biology, University of Copenhagen, Ole Maaløes  
13 Vej 5, DK-2200 Copenhagen, Denmark.

14 2: Biotech Research and Innovation Centre, University of Copenhagen, Ole Maaløes Vej 5, DK-2200,  
15 Copenhagen, Denmark.

16 3: Technical University of Denmark, Department of Electrical Engineering, Ørsted Plads, Bld. 349,  
17 DK-2800 Kgs. Lyngby, Denmark.

18 4: Niels Bohr Institute, University of Copenhagen, Universitetsparken 5, DK-2100 Copenhagen,  
19 Denmark.

20 5: College of Life and Environmental Sciences, University of Exeter, Geoffrey Pope Building,  
21 Stocker Road, Exeter EX4 4QD, United Kingdom.

22  
23 \*Corresponding author: R.H.-P. ([rhpetersen@bio.ku.dk](mailto:rhpetersen@bio.ku.dk)).  
24

25 **Abstract**

26 Since life is completely dependent on water, it is difficult to gauge the impact of solvent change. To  
27 analyze the role of water as a solvent in biology, we replaced water with heavy water (D<sub>2</sub>O), and  
28 investigated the biological effects by a wide range of techniques, using the fission yeast  
29 *Schizosaccharomyces pombe* as model organism. We show that high concentrations of D<sub>2</sub>O lead to  
30 altered glucose metabolism, growth retardation, and inhibition of meiosis. However, mitosis and  
31 overall cell viability were only slightly affected. After prolonged incubation in D<sub>2</sub>O, cells displayed  
32 gross morphological changes, thickened cell walls as well as aberrant septa and cytoskeletal  
33 organization. RNA sequencing revealed that D<sub>2</sub>O causes a strong downregulation of most tRNAs and  
34 triggers activation of the general stress response pathway. Genetic screens identified several D<sub>2</sub>O  
35 sensitive mutants, while mutants compromised in the cell integrity pathway, including the protein  
36 kinase genes *pmk1*, *mkh1*, *pek1* and *pck2*, that control cell wall biogenesis, were more tolerant to  
37 D<sub>2</sub>O. We speculate that D<sub>2</sub>O affects the phospholipid membrane or cell wall glycans causing an  
38 activation of the cell integrity pathway. In conclusion, the effects of solvent replacement are  
39 pleiotropic but the D<sub>2</sub>O-triggered activation of the cell integrity pathway and subsequent increased  
40 deposition of cell wall material and septation problems appear most critical for the cell growth  
41 defects.

42

## 43 **Introduction**

44 Although in principle life might be possible in other solvents such as ammonia or formamide [1], life,  
45 as we know it, is completely dependent on water. As solvent, water provides a liquid phase that  
46 facilitates chemical reactions by allowing reactants to encounter each other, but also ensures that  
47 various biomolecules, organelles and tissues can maintain a functional structure. Importantly, water  
48 also actively partakes in chemical reactions as a reactant (e.g. hydrolysis) or as a product (e.g.  
49 condensation). To some degree, organic solvents, such as DMSO, fulfill some of these requirements.  
50 However, these solvents are often toxic already at low concentrations [2] and do not generally engage  
51 in chemical reactions.

52  $^1\text{H}$  is by far the most abundant isotope of hydrogen and while  $^2\text{H}$  or deuterium (D) and  $\text{D}_2\text{O}$  (heavy  
53 water) are fairly similar to  $^1\text{H}$  and light water, respectively, the chemical effects of isotope substitution  
54 is far stronger than seen for most other chemical elements [3]. Thus, when substituting water as  
55 solvent, there are very significant differences between light and heavy water. Both compounds are  
56 non-radioactive, but  $\text{D}_2\text{O}$  is denser (1.1 vs. 1.0  $\text{g mL}^{-1}$ ) and more viscous (1.25 vs. 1.00  $\text{mPa s}$  at 20  
57  $^\circ\text{C}$ ) than  $\text{H}_2\text{O}$ . It has a higher melting point (3.82 vs. 0  $^\circ\text{C}$ ) as well as a higher boiling point (101.4 vs.  
58 100  $^\circ\text{C}$ ), consistent with the deuterium bonds in  $\text{D}_2\text{O}$  being stronger than the corresponding hydrogen  
59 bonds in  $\text{H}_2\text{O}$ . Accordingly,  $\text{D}_2\text{O}$  is known to influence the conformational and functional properties  
60 of proteins and other macromolecules *in vitro* [4, 5].

61 Although the natural abundance of deuterium in water is less than 0.02%, it is interesting to study the  
62 cellular effects of  $\text{D}_2\text{O}$  because its unique properties allow for a complete solvent replacement, and  
63 may therefore highlight the importance of the biophysical properties of  $\text{H}_2\text{O}$  as solvent for biological  
64 processes. However, the cellular consequences of exchanging  $\text{H}_2\text{O}$  with  $\text{D}_2\text{O}$  have so far not been  
65 systematically addressed. When  $\text{D}_2\text{O}$  replaces  $\text{H}_2\text{O}$  in the cell, it affects reaction kinetics and the  
66 structure of macromolecules, giving rise to the so-called “solvent isotope effect” [5]. However, the

67 deuterium atoms in D<sub>2</sub>O can also metabolically replace hydrogen atoms in biomolecules. When  
68 deuterium is metabolically incorporated into proteins and other biomolecules, the properties of C-D  
69 bonds in particular, which do not readily exchange with H, become important. Thus, C-D bonds may  
70 affect the structure and dynamics of macromolecules, resulting in the “deuterium isotope effect” [5].  
71 Since hydrogen is much lighter than other biologically-relevant elements, the proportional isotope  
72 effects of deuterium are significantly stronger than e.g. those of <sup>13</sup>C (vs. <sup>12</sup>C) or <sup>18</sup>O (vs. <sup>16</sup>O) [3].  
73 Soon after its discovery and large-scale manufacture, the first biological effects of D<sub>2</sub>O were  
74 described (for review see [5]). Today we know that small amounts of D<sub>2</sub>O are not toxic [6], and D<sub>2</sub>O  
75 can be used to measure the metabolic rate in humans [7, 8], or as a tracer for compliance in drug trials  
76 [9]. However, biological studies on D<sub>2</sub>O have shown that at high levels (>25% of body weight) D<sub>2</sub>O  
77 is toxic to animals and causes sterility [5]. In addition, heavy water has been reported to affect the  
78 period of circadian oscillations in *Drosophila* [10], while studies in rodents have shown that high  
79 D<sub>2</sub>O concentrations causes anemia and early death [11, 12]. In plant and animal cells, D<sub>2</sub>O inhibits  
80 mitosis [13, 14], which may be linked to increased microtubule stabilization [15, 16]. Bacteria can  
81 adapt to grow in 100% D<sub>2</sub>O [17-19], while budding yeast cells can tolerate up to 90% heavy water  
82 [20]. However, heavy water sensitivity has been described as a conditional phenotype in budding  
83 yeast and a D<sub>2</sub>O hypersensitive mutant in the *ASP5* gene, encoding a cytosolic aspartate  
84 aminotransferase involved in nitrogen metabolism, has been isolated [20]. Recently, it was shown  
85 that the amount of deuterated metabolites decline in yeast cells during aging, and supplementing the  
86 growth medium with 50 % D<sub>2</sub>O increases the lifespan [21], presumably by slowing the metabolism.  
87 As a solvent, D<sub>2</sub>O has been reported to marginally increase the heat stability of macromolecules [4],  
88 including double stranded DNA [22, 23] and some proteins [24-26]. In addition, D<sub>2</sub>O can function as  
89 a chemical chaperone for misfolded proteins [27]. However, on the cellular level, D<sub>2</sub>O may lead to a  
90 decrease in heat tolerance [28].

91 Here, we analyzed the biochemical and physiological effects of D<sub>2</sub>O on the fission yeast  
92 *Schizosaccharomyces pombe*, a well characterized and genetically tractable eukaryotic model  
93 organism [29]. We found that the *solvent exchange* effect rather than the *isotope* effect caused a  
94 strongly reduced growth rate at high concentrations of D<sub>2</sub>O. Although the overall cell viability  
95 remained largely unaffected, D<sub>2</sub>O inhibited the glucose metabolism and caused gross morphological  
96 changes, thickened cell walls and abnormal cell septation. Transcriptomic analyses revealed that D<sub>2</sub>O  
97 triggered differential expression of numerous genes, including a strong reduction of tRNAs, and  
98 activation of the general stress response pathway. Genetic screens identified several D<sub>2</sub>O sensitive  
99 mutants, including a deletion in the *rga7* GTPase activating protein (GAP). Surprisingly, mutants in  
100 *pck2*, *mkh1*, *pek1*, and *pmk1*, that encode kinases of the cell integrity pathway, which controls cell  
101 wall biogenesis, were tolerant to the solvent exchange.

102

103 **Results**

104

105 *Dramatically reduced growth of S. pombe exposed to high concentrations of D<sub>2</sub>O*

106 The D<sub>2</sub>O was purchased as 99.8% D<sub>2</sub>O/0.2% H<sub>2</sub>O. For simplicity, when all regular deionized water  
107 in the growth medium was replaced with the 99.8% pure D<sub>2</sub>O we will in the following refer to these  
108 experiments as performed at 100% D<sub>2</sub>O, and similarly for experiments conducted at lower D<sub>2</sub>O  
109 concentrations. Importantly, the other components (e.g. glucose) in the media were, unless stated  
110 otherwise, not deuterated. Hence, even in our 100% D<sub>2</sub>O media some non-exchangeable protons are  
111 available to the cells and will be incorporated in biomolecules.

112 As a first step in our cell physiological analyses of D<sub>2</sub>O, we followed the growth of wild type *S.*  
113 *pombe* cells exposed to different concentrations of D<sub>2</sub>O. Pre-cultures, prepared in standard rich  
114 medium (YES medium with H<sub>2</sub>O), were washed and diluted with YES medium with 100%, 75%,  
115 50%, 25% and 0% heavy water and growth was monitored by measuring the turbidity of the cultures.  
116 At D<sub>2</sub>O concentrations >50%, the cell growth rate was strongly reduced (Fig. 1AB) and the onset of  
117 growth inhibition occurred rapidly, already within the first generation (Fig. 1C). The effect was  
118 dosage dependent leading to an increase in doubling time from approximately 2.5 hours in 0% D<sub>2</sub>O  
119 to around 7 hours at 100% D<sub>2</sub>O (Fig. 1B). The observed growth retardation was not caused by cell  
120 death, since cell viability was only marginally affected after prolonged incubation with D<sub>2</sub>O (Fig.  
121 1D).

122 Since bacteria can be adapted to growth at 100% D<sub>2</sub>O [17, 19], we tested if pre-incubating the cells  
123 with different amounts of D<sub>2</sub>O would allow for increased growth rates in the presence of D<sub>2</sub>O on solid  
124 rich medium. However, this was not the case for fission yeast. Hence, for all tested pre-incubations  
125 no changes in growth were observed (Fig. 1E), although we noted that when grown on solid media,  
126 wild type cells eventually formed colonies even at 100% D<sub>2</sub>O.

127 The observed effects of D<sub>2</sub>O may be caused by either incorporating deuterium into macromolecules  
128 or by replacing the solvent (H<sub>2</sub>O) with D<sub>2</sub>O or by a combination of the above. Thus, we compared  
129 the growth of cells on media prepared with normal glucose or deuterated glucose (glucose-C-d<sub>7</sub>). On  
130 rich media, there was no obvious effect of exchanging glucose with deuterated glucose (Fig. 1F).  
131 Since amino acids are plentiful in this medium, significant protein deuteration of non-solvent-  
132 exchangeable protons is not expected. On minimal medium, a slight growth inhibitory effect was  
133 observed (Fig. 1F). Since glucose here also serves as a carbon source for amino acid synthesis, the  
134 slightly reduced growth is, at least in part, likely to be ascribed to deuteration of proteins and other  
135 biomolecules. However, since the effect of deuterated glucose is minor, the observed effect of D<sub>2</sub>O  
136 is mainly caused by the solvent replacement. Accordingly, the growth retardation observed on media  
137 prepared with both deuterated glucose and D<sub>2</sub>O were similar to that observed on media with  
138 hydrogenated (normal) glucose and D<sub>2</sub>O (Fig. 1F). We therefore conclude that the growth inhibitory  
139 effect of D<sub>2</sub>O largely can be attributed to the *solvent isotope effect* rather than an effect of deuterium-  
140 induced malfunction of various biomolecules.

141

142 *D<sub>2</sub>O causes gross morphological changes, increased cell wall thickness and aberrant cell septation*

143 The reduced cell growth was accompanied by an elongated and swollen cell morphology, which was  
144 more apparent after prolonged incubation in D<sub>2</sub>O (Fig. 2A). Cell septation was analyzed by calcofluor  
145 staining. This revealed a clear dosage-dependent septation defect, which appeared gradually upon  
146 shifting the cells to D<sub>2</sub>O medium. Hence, after 5 hours in the exponential growth phase, roughly 20%  
147 of the cells in 0% D<sub>2</sub>O were septated, while in 100% D<sub>2</sub>O this was increased to 60% of the cells (Fig.  
148 2B). After 24 hours, the cells grown in 0% D<sub>2</sub>O had entered stationary phase (Fig. 1A) and were  
149 therefore not septated (Fig. 2AB). However, at 100% D<sub>2</sub>O about 60% of the cells were still septated  
150 (Fig. 2B) and about 20% displayed multiple septa (Fig. 2AB). In addition, an increased thickness of

151 septa was visible already after 5 hours in D<sub>2</sub>O, which was succeeded by unevenly shaped septa after  
152 24 hours (Fig. 2A).

153 By transmission electron microscopy we confirmed that cells grown for 24 hours in D<sub>2</sub>O appeared  
154 swollen and displayed thickened cell walls (Fig. 2CD). Accordingly, cells incubated for 24 hours in  
155 D<sub>2</sub>O-containing medium were resistant to the cell wall degrading enzyme  $\beta$ -glucanase, supporting  
156 that, unlike the situation for bacteria [19], D<sub>2</sub>O causes cell wall thickening of yeast cells (Fig. 2E).

157 The *S. pombe* septum consists of primary (outer) and secondary (inner) septa that are made up of  
158 different glucans [30]. The secondary septum will eventually form the cell wall at the tip of the  
159 daughter cell. Both the primary septa (white layer) and secondary septa (grey layers flanking the  
160 primary septum) were thicker for cells grown for 24 hours in D<sub>2</sub>O (Fig. 2CD). In general, septum  
161 formation appeared abnormal in D<sub>2</sub>O. For example, in some of the D<sub>2</sub>O-treated cells we observed an  
162 asymmetrical septum growth from only one side (Fig. 2D, panels e, g, and k), while for the control  
163 cells, the septa always grew uniformly inwards (Fig. 2D, panels a-c). Once the septa formed, their  
164 closure appeared normal, but for the cells in D<sub>2</sub>O, septum material continued to build up, leading to  
165 strongly thickened secondary septa (Fig. 2D, panels d-k). Since the primary septa were stabilized in  
166 D<sub>2</sub>O, the cells failed to detach and remained associated with sister cells from previous generations  
167 (Fig. 2D, panel j). However, rather than reinitiating another cell cycle and forming a chain of cells,  
168 most of the multiseptated cells appeared to have formed the second or third septum near the original  
169 septum (Fig. 2D, panels e, f, and j), and not between nuclei, indicating that no further nuclear division  
170 occurred. This may suggest that D<sub>2</sub>O affects the septation initiation network [31]. Moreover, in some  
171 cells we observed that the second or third septum seemed to branch from the original septum, or to  
172 grow perpendicular to it (Fig. 2D, panels i and j).

173

174 *D<sub>2</sub>O affects both the actin and tubulin cytoskeleton*



175 To determine if the cytoskeleton was affected, wild type cells carrying the LifeAct-GFP actin marker  
176 and GFP-tagged  $\alpha$ -tubulin (Atb2) were exposed to D<sub>2</sub>O and analyzed by fluorescence microscopy.  
177 In *S. pombe* the actin cytoskeleton typically appears as cortical patches located mainly at the growing  
178 cell tips during interphase and as a contractile ring, which forms during mitosis [32]. The tubulin  
179 cytoskeleton is composed of cables that extend between the cell ends in interphase and as a dense  
180 spindle between the sister chromatids during mitosis [32].  
181 Upon treatment with D<sub>2</sub>O, we observed that the actin patches were no longer concentrated at the cell  
182 tips, but rather appeared more evenly distributed throughout the cells (supporting information, Fig.  
183 S1A). The formation of the contractile ring, however, appeared normal (supporting information, Fig.  
184 S1A). In response to D<sub>2</sub>O, the tubulin cables were shorter, more numerous, and in some cells  
185 perpendicular rather than parallel to the cell (supporting information, Fig. S1B). However, similar to  
186 the situation with the actin cytoskeleton in mitosis, the mitotic spindle appeared unaffected by D<sub>2</sub>O  
187 (supporting information, Fig. S1B). Thus, unlike the situation in mammalian cells [16], the mitotic  
188 spindle was formed and appeared normal even after prolonged incubation in D<sub>2</sub>O.

189

#### 190 *D<sub>2</sub>O inhibits meiosis*

191 To test whether the solvent replacement affected cell cycle progression, cells exposed to different  
192 concentrations of D<sub>2</sub>O were analyzed for DNA content by DNA staining and automated microscopy.  
193 In *S. pombe*, cytokinesis normally occurs in S phase and cells in G<sub>1</sub> and S phase are therefore binuclear  
194 and, by DNA staining, indistinguishable from the cells in G<sub>2</sub>. Accordingly, the DNA content profile  
195 presents as a single 2N peak. After five hours of exponential growth in D<sub>2</sub>O, the DNA peak remained  
196 unchanged. However, we note the appearance of a small population with 4N DNA content  
197 (supporting information, Fig. S2A), which may represent cells that have re-replicated DNA without  
198 prior mitosis or cells that have failed to undergo cytokinesis. After 24 hours, when the cultures with

199 low concentrations of D<sub>2</sub>O had entered stationary phase with some cells arrested in the G<sub>1</sub> phase, the  
200 1N peak was still not evident for cells grown at 75% or 100% D<sub>2</sub>O (supporting information, Fig.  
201 S2A). This may indicate a reduced progression through mitosis, whereas the sharp 2N peak indicates  
202 that the cells spend a relatively short time period in S phase, suggesting that progression through S  
203 phase is not strongly affected. To more directly test whether mitosis was affected, the number of cells  
204 displaying spindles was determined using the Atb2-GFP strain. After 24 hours in D<sub>2</sub>O, we observed  
205 a small increase in the number of cells with spindles (supporting information, Fig. S2B), indicating  
206 that D<sub>2</sub>O only causes a slightly slowed progression through mitosis, and the reduced cell growth of  
207 *S. pombe* cells in D<sub>2</sub>O is therefore most likely caused by an overall slowing of the cell cycle.  
208 To test if meiosis was affected, a wild type strain (*h<sup>90</sup>*) was starved for nitrogen in the presence of  
209 H<sub>2</sub>O or D<sub>2</sub>O. After two days, multiple asci were evident for the cells grown on the H<sub>2</sub>O control  
210 medium, whereas for cells incubated on D<sub>2</sub>O medium we were never able to detect any asci  
211 (supporting information Fig. S3). Accordingly, iodine stained the starch in spore walls dark for the  
212 cells on the H<sub>2</sub>O medium, but failed to stain the cells on the D<sub>2</sub>O medium (supporting information  
213 Fig. S3AC), suggesting that zygote formation and/or meiosis is severely inhibited by D<sub>2</sub>O. Using  
214 diploid cells, we observed numerous asci when the cells were incubated in H<sub>2</sub>O, but only a few asci  
215 for cells on D<sub>2</sub>O medium (supporting information Fig. S3BC). Collectively, these data indicate that  
216 D<sub>2</sub>O inhibits mating and meiosis. An obvious hypothesis is that the mating defect, at least in part, is  
217 caused by the D<sub>2</sub>O-induced cell wall thickening.

218

#### 219 *D<sub>2</sub>O blocks glucose metabolism through inhibition of glucose-6-phosphate isomerase*

220 Since the isotope effects of D<sub>2</sub>O are likely to disturb metabolism [33], we decided to investigate  
221 whether D<sub>2</sub>O affects the kinetics of enzymes in the glycolytic pathway on a short timescale. This was  
222 accomplished using hyperpolarized NMR (signal enhanced nuclear magnetic resonance) [34] which

223 allows detailed metabolic mapping of glycolysis. A  $^{13}\text{C}$ -labelled glucose tracer was fed to live cells  
224 in either 100%  $\text{D}_2\text{O}$  or 100%  $\text{H}_2\text{O}$  MES buffer for 2 or 10 minutes, after which the metabolism was  
225 quenched in acid and the soluble metabolites extracted. This extract was then hyperpolarized and  
226 analyzed with single spectrum  $^{13}\text{C}$ -NMR. Examples of an NMR spectra from cells fed with the  
227 glucose tracer in  $\text{D}_2\text{O}$  and  $\text{H}_2\text{O}$ , respectively, are shown in Fig. 3A. The crowded spectral region from  
228 60-100 ppm contains signals from the substrate glucose. The singlet signal at 24 ppm originates from  
229 an added standard, which allows quantification and direct comparison between the metabolite signals  
230 in the different spectra [35]. This comparison clearly revealed that several metabolic changes appear  
231 when *S. pombe* is fed glucose in  $\text{D}_2\text{O}$ . In particular, we noted the accumulation of a large pool of  $\alpha$ -  
232 glucose-6-phosphate ( $\alpha$ -G6P) (Fig. 3A, blue insert), suggesting that the  $\alpha$  anomer is being  
233 metabolised more slowly in  $\text{D}_2\text{O}$ . Whereas  $\beta$ -G6P is readily used as a substrate in the pentose  
234 phosphate pathway (PPP),  $\alpha$ -G6P must be converted to  $\beta$ -G6P for use in PPP or to  $\beta$ -fructose-6-  
235 phosphate ( $\beta$ -F6P) for use in glycolysis. A single enzyme, glucose-6-phosphate isomerase (GPI, EC  
236 5.3.1.9), is responsible for both types of isomerase activities (<https://www.genome.jp/kegg/>). The PPP  
237 was indeed active, as demonstrated by the signals from 6-phosphogluconate (6PGA) (Fig. 3A, red  
238 insert). The 6PGA pool was approximately twice as large in  $\text{D}_2\text{O}$  as in  $\text{H}_2\text{O}$ . That the activity of PGI  
239 could be negatively affected by the exchange of  $\text{H}_2\text{O}$  for  $\text{D}_2\text{O}$  is plausible since the mechanism of  
240 catalytic isomerization involves several proton transfer steps [36].  
241 The doublet signal at about 179.4 ppm, assigned to gluconate (GA) (Fig. 3A), confirms that the  
242 gluconate shunt is active in *S. pombe* cells [37, 38]. In 30-sec. time-resolved data (supporting  
243 information, Fig. S4) only gluconate could be detected and the gluconate shunt seemed to be  
244 unaffected by  $\text{D}_2\text{O}$ .  
245 The accumulation of  $\alpha$ -G6P in the  $\text{D}_2\text{O}$ -exposed cells is already apparent after 2 minutes of incubation  
246 with the glucose tracer (supporting information, Fig. S5). However, in order to facilitate

247 quantification and comparison of the amount of G6P under the two studied conditions, exposure times  
248 of 10 minutes were used, revealing an about 8 times larger pool of G6P in D<sub>2</sub>O exposed cells (Fig.  
249 3B). In summary, glycolysis as well as the pathway leading to PPP are affected negatively by an  
250 inhibition of  $\alpha$ -G6P isomerization in *S. pombe* cells exposed to D<sub>2</sub>O (Fig. 3C). We conclude that,  
251 under these conditions, *S. pombe* cells use a highly active gluconate shunt to produce PPP metabolites  
252 from glucose, which allow the cells to bypass GPI.

253

#### 254 *D<sub>2</sub>O induces a cellular stress response*

255 Recently, it was reported that deuterium causes dramatic changes in the *E. coli* proteome [19]. To  
256 determine if the D<sub>2</sub>O-triggered growth inhibition was accompanied by differential gene expression,  
257 total RNA was purified from *S. pombe* cells under each condition in quadruplicates, and analyzed  
258 by next-generation sequencing. The four repeats of each condition clustered in separate groups (Fig.  
259 4AB). In total, we could assign read counts to 6992 of 7015 annotated genes in the *S. pombe* genome.  
260 By setting a significance cut-off of absolute log<sub>2</sub> fold change  $\geq 2$  between the groups and adjusted *p*  
261 values  $\leq 5\%$  (false discovery rate, FDR), we identified 178 genes that were significantly up-  
262 regulated, while 38 genes were significantly down-regulated after five hours with D<sub>2</sub>O. After 24  
263 hours in D<sub>2</sub>O 284 genes were significantly up-regulated and 51 genes were significantly down-  
264 regulated. The identified differentially expressed genes are listed in the supporting material  
265 (supporting material file 1). The sequencing data has been uploaded to Gene Expression Omnibus  
266 (<https://www.ncbi.nlm.nih.gov/geo/>; accession no. GSE119785). To further test the quality of the  
267 dataset, we quantified the mRNA by real-time PCR of selected up-regulated genes. In agreement  
268 with the RNA sequencing, the expression of these genes was up-regulated (supporting information,  
269 Fig. S6).

270 When analyzing the differentially expressed genes, we noted a strong D<sub>2</sub>O-dependent down-  
271 regulation of several cytosolic and mitochondrial tRNAs (Table S1). This is in line with earlier  
272 observations in *E. coli* [39] and the reduced abundance of translational proteins recently observed  
273 by proteomics [19]. Comparison of our datasets with previous transcriptomic analyses in fission  
274 yeast (Chen et al., 2003; Poulsen et al., 2017; Vjestica et al., 2013) indicated that D<sub>2</sub>O causes a  
275 general stress response in the cells. Thus, the D<sub>2</sub>O-triggered gene expression pattern resembled those  
276 observed upon heat shock, deletion of the Hsf1 transcriptional repressor Mas5 or the Hsp70  
277 chaperone Ssa2, or overexpression (OE) of the co-chaperone Bag101 (Fig. 4CD). We therefore  
278 tested if prior activation of the stress response pathway conferred any fitness advantage to the cells  
279 in the presence of D<sub>2</sub>O. To this end, wild type cells were given a 30 minute heat shock at 43 °C  
280 immediately prior to testing growth in the presence of D<sub>2</sub>O on solid media. However, rather than  
281 protecting the cells from D<sub>2</sub>O, this revealed a slight, but reproducible, decreased D<sub>2</sub>O tolerance (Fig.  
282 4E), suggesting that induction of molecular chaperones, oxidoreductases and other stress-relieving  
283 proteins are unable to counteract the adverse effects of D<sub>2</sub>O. Similarly, applying oxidative stress via  
284 a pre-treatment of cells for 1 hour with 0.7 mM H<sub>2</sub>O<sub>2</sub> also did not provide protection from D<sub>2</sub>O (Fig.  
285 4F). Conversely, pre-incubating cells for 5 hours with 100% D<sub>2</sub>O led to an increased survival of  
286 cells after a severe heat shock (Fig. 4G) and an increased growth in the presence of H<sub>2</sub>O<sub>2</sub> (Fig. 4H).  
287 This suggests that the D<sub>2</sub>O-triggered induction of the stress-response genes leads to increased  
288 tolerance towards heat-shock and oxidative stress conditions.

289

#### 290 *Screening the S. pombe gene deletion library for D<sub>2</sub>O sensitive or D<sub>2</sub>O resistant mutants*

291 Previous studies in budding yeast have shown that heavy water sensitivity is a conditional phenotype  
292 and that a loss-of-function mutant in *ASP5*, encoding an aspartate aminotransferase, is hypersensitive  
293 to D<sub>2</sub>O [20]. As a next step, we therefore explored the genetic requirements for D<sub>2</sub>O tolerance by

294 individually screening 3233 different mutants from the fission yeast haploid gene deletion collection  
295 for hypersensitivity to D<sub>2</sub>O on solid media.  
296 Stationary phase cells were replica plated in 384-pin format onto YES plates with 0% or 100% D<sub>2</sub>O.  
297 This concentration of D<sub>2</sub>O was used because it completely blocked growth of a deletion strain in the  
298 *ASP5* orthologue in fission yeast, *caal*, but also impaired the growth of wild type cells (Fig. 5A), so  
299 both D<sub>2</sub>O hypersensitive and resistant mutants could be scored. We selected mutants with reduced  
300 growth on D<sub>2</sub>O medium, but excluded mutants with slow growth on 0% D<sub>2</sub>O medium. This led to 39  
301 mutants scored as D<sub>2</sub>O sensitive (Table 1). We noted that the positive control, *caal*Δ, was among  
302 these. We also isolated one mutant, *pmk1*Δ, deleted for the gene encoding the Pmk1 MAP kinase that  
303 appeared resistant to D<sub>2</sub>O.

304 To assess the validity of the screen, we tested selected D<sub>2</sub>O sensitive mutants and the *pmk1*Δ strain  
305 in growth assays on solid media. This revealed that the *pmk1*Δ strain was slightly resistant to D<sub>2</sub>O,  
306 while the selected sensitive mutants all displayed a reduced D<sub>2</sub>O tolerance (Fig. 5B). In addition,  
307 using the BioGRID database (<https://thebiogrid.org/>) [40] we noted several previously identified  
308 genetic interactions between many of the D<sub>2</sub>O hypersensitive/resistant strains, including ones  
309 between the D<sub>2</sub>O tolerant *pmk1*Δ strain and the D<sub>2</sub>O sensitive *cch1*Δ [41, 42], *rga7*Δ [43, 44], *cph2*Δ  
310 [45] and *swd2*Δ [45] (Fig. 5C).

311

### 312 *D<sub>2</sub>O activates the cell wall integrity pathway*

313 To obtain further insight into the biological effects of the solvent replacement, we set up a screen for  
314 spontaneous D<sub>2</sub>O resistant mutants. Wild type cells were inoculated in 100% D<sub>2</sub>O rich medium in 20  
315 separate tubes and incubated at 30 °C. After about one week, slight growth was apparent in four of  
316 the tubes, suggesting that independent spontaneous mutations that allowed for D<sub>2</sub>O tolerance had  
317 occurred in these cultures. To avoid selecting clones, cells from each culture were spread on 100%

318 D<sub>2</sub>O plates and only one well-isolated large colony from each plate was selected. This led to the  
319 isolation of three independent heavy water resistant (*hwr*) mutants (*hwr1-3*), that all displayed a  
320 markedly increased growth in the presence of D<sub>2</sub>O, but otherwise appeared normal (Fig. 6A). The  
321 increased tolerance to D<sub>2</sub>O was also evident on 100% D<sub>2</sub>O minimal media (supporting information,  
322 Fig. S7). However, the *hwr* mutants were not resistant to the slight growth inhibitory effect conferred  
323 by deuterated glucose on minimal medium (supporting information, Fig. S7), indicating that the  
324 isolated *hwr* mutants were specifically tolerant to the solvent replacement effect.

325 Since the isolated *hwr* strains were the result of spontaneous mutations, as opposed to mutagenesis  
326 induced by chemicals or irradiation, we reasoned that their genome sequences were likely highly  
327 similar with the exception of the mutations causing D<sub>2</sub>O resistance. We therefore analyzed the *hwr*  
328 strains and their wild type parent by whole genome sequencing using Illumina HiSeq2000 high-  
329 throughput sequencing technology. The average sequence coverage was greater than 1000 reads/bp  
330 for all samples. The full sequencing datasets are deposited at the Sequence Read Archive  
331 (<https://www.ncbi.nlm.nih.gov/sra>; accession no. SRP161455). Comparison of obtained sequences  
332 from the *hwr* strains and the wild type control revealed a match, except for the listed changes (Table  
333 2, and supporting material file 2).

334 When studying the mutated genes in the *hwr1-3* strains (Table 2), we noticed that several have been  
335 linked to tRNA metabolism (*gta2* and *trm72*) and cell wall formation (*pck2*, *mkh1* and *pek1*). The  
336 kinases Pck2, Mkh1 and Pek1 were mutated in the *hwr3*, *hwr2* and *hwr1* strains, respectively. These  
337 kinases function as upstream activators of Pmk1 in the so-called cell integrity pathway [46, 47], which  
338 is activated by cell wall damage to upregulate synthesis of various cell wall components [48], while  
339 the Rho2 GAP, Rga7, restricts signaling through this pathway (Fig. 6B) [43, 44]. None of these genes  
340 are essential, but except for the D<sub>2</sub>O-sensitive *rga7*Δ and D<sub>2</sub>O-tolerant *pmk1*Δ, the deletion mutants  
341 were not included in the screened knock-out library. The *pek1* and *mkh1* mutations both result in

342 frame shifts in regions encoding the respective kinase domains of Pck1 and Mkh1 that we predict will  
343 cause loss of function, while *pck2* contained a missense mutation (supporting information, Table S2).  
344 These changes were confirmed by PCR and Sanger sequencing (supporting information, Fig. S8-  
345 S10). We therefore continued to test if the D<sub>2</sub>O tolerant phenotype was also evident in the independent  
346 *pck2-8*, *mkh1Δ*, and *pek1Δ* strains. Indeed, in growth assays, these strains appeared more resistant to  
347 D<sub>2</sub>O than wild type cells (Fig. 6C), thus phenocopying the *hwr* strains. In agreement with this, the  
348 cell septation problems observed for wild type cells in D<sub>2</sub>O were reduced in the *hwr* strains (Fig. 6D).  
349 The conclusions above suggest that D<sub>2</sub>O activates the cell integrity pathway and blocking this  
350 pathway leads to an increased fitness at high concentrations of D<sub>2</sub>O, presumably by limiting synthesis  
351 of glycans and/or other cell wall components. To test this prediction, we directly analyzed the  
352 activation of the cell integrity pathway in response to D<sub>2</sub>O in a wild type strain, expressing HA-tagged  
353 Pmk1. This revealed a marked increase in the level of phosphorylated Pmk1 after 5 and 24 hours in  
354 D<sub>2</sub>O-containing media (Fig. 6E), which further suggests that the solvent replacement activates the  
355 cell integrity pathway. In turn, blocking the Pck2-Mkh1-Pek1-Pmk1 signaling axis, at least partially,  
356 alleviates the D<sub>2</sub>O-triggered cell wall and growth defects, while activating it by deletion of *rga7*  
357 increases D<sub>2</sub>O sensitivity (Fig. 6B).

358



## 359 Discussion

360 In the present study, we have systematically addressed the cellular and biochemical consequences of  
361 exchanging H<sub>2</sub>O for D<sub>2</sub>O in eukaryotic cells using *S. pombe* as a model organism. The effect of D<sub>2</sub>O  
362 cannot directly be compared to any other insults that a cell can experience because it entails an  
363 almost complete substitution of solvent. This possibility of solvent change for biological reactions  
364 and life as such is unique. In some ways it can be compared to changing pH, which also implies  
365 global solvent effects, but contrary to shifts in pH, which are common in nature and has well-defined  
366 biological responses, a shift to D<sub>2</sub>O is completely abiotic and something that we can say with  
367 absolute certainty that cellular responses have not experienced before. Thus, querying the effects of  
368 D<sub>2</sub>O on cellular growth and metabolism highlights subtleties of the biophysical properties of H<sub>2</sub>O as  
369 solvent for biological processes. *A priori* one would expect that the toxic effects of replacing H<sub>2</sub>O  
370 with D<sub>2</sub>O would be the sum of multiple smaller pleiotropic effects, and it is therefore surprising that  
371 this work demonstrates that modification of a single signaling pathway is sufficient to overcome the  
372 growth defect induced by the solvent replacement.

373 In agreement with early studies using human cells and other model systems [5], we observed that  
374 high concentrations of D<sub>2</sub>O strongly reduced cell growth. In principle, this effect can be the result of  
375 deuteration of various biomolecules or the solvent exchange effect. When D is incorporated into  
376 biomolecules, this can occur either *de novo*, where D<sub>2</sub>O donates D atoms during *de novo* biosynthesis,  
377 or by exchange of loosely bound hydrogens in preexisting biomolecules. Hydrogen covalently bound  
378 to carbon does not exchange, and generation of C-D bonds therefore requires *de novo* synthesis. Since  
379 we only observed minor effects of exchanging glucose with deuterated glucose on minimal medium,  
380 metabolic incorporation of D into C-D bonds does not appear to strongly affect the growth of *S.*  
381 *pombe*. The resulting changes in stability and/or dynamics of proteins and other biomolecules,  
382 carrying C-D bonds, therefore appears negligible next to the observed solvent effects of exchanging

383 H<sub>2</sub>O for D<sub>2</sub>O. However, upon substituting H<sub>2</sub>O with D<sub>2</sub>O, loosely-bound hydrogen atoms such as  
384 those bound to amide/amino nitrogen or hydroxy oxygen will, depending on solvent exposure,  
385 exchange with deuterium atoms in the D<sub>2</sub>O solvent. Here, the properties of hydrogen bonds compared  
386 to the stronger and slightly longer deuterium bonds likely become highly relevant. Hence, deuterium  
387 transfer reactions are expected to be less efficient than the corresponding proton transfer reactions.  
388 Also, the more ordered nature of D<sub>2</sub>O compared to H<sub>2</sub>O suggests that proteins and other biomolecules  
389 are less dynamic and more tightly wrapped in D<sub>2</sub>O than in H<sub>2</sub>O [49]. Accordingly, D<sub>2</sub>O is known to  
390 both directly (as a solvent) and indirectly (through deuteration) affect the structure and stability of  
391 proteins and other macromolecules *in vitro* [25, 50-54].

392 One of the direct effects of the solvent exchange that we observed was on the central metabolism,  
393 where we directly and on a very short time-scale (2 minutes) noted a clear accumulation of  $\alpha$ -G6P,  
394 suggesting that G6P isomerase is inhibited. The solvent exchange also led to an activation of a general  
395 stress response pathway. Typically, this pathway is provoked by protein misfolding events,  
396 suggesting that solvent exchange may destabilize proteins *in vivo*. However, inducing molecular  
397 chaperones through a heat shock prior to incubation with D<sub>2</sub>O did not protect cells from the D<sub>2</sub>O-  
398 induced growth retardation. This indicates that activation of the stress response pathway is not tuned  
399 to counter the adverse effects of the solvent exchange, although it has been reported that  
400 overexpression of Hsp70 may protect budding yeast cells from D<sub>2</sub>O [55]. In line with chaperones  
401 being unable to protect fission yeast cells against D<sub>2</sub>O, we were unable to adapt *S. pombe* to growth  
402 at higher D<sub>2</sub>O concentrations and we did not identify any chaperone mutants as hypersensitive or  
403 resistant to D<sub>2</sub>O. Conversely, it was not surprising to find that pre-treating cells with D<sub>2</sub>O led to an  
404 increased tolerance towards heat and oxidizing conditions, which is most likely caused by the D<sub>2</sub>O-  
405 induced activation of the stress response pathway. The activated stress response and slow growth  
406 phenotypes are probably also connected with our observation that exposure to D<sub>2</sub>O caused a strong

407 decrease in the expression of several tRNAs. In budding yeast and in bacteria it has been shown that  
408 tRNAs are degraded in response to stress conditions [56, 57], and we speculate that perhaps a similar  
409 mechanism operates in *S. pombe*.

410 The multiple effects, we observed for cells in the presence of D<sub>2</sub>O, not surprisingly, suggest that the  
411 effects of the solvent exchange are pleiotropic. Accordingly, it is easy to imagine a number of genetic  
412 defects that may cause cells to become hypersensitive to D<sub>2</sub>O. However, it is harder to reconcile  
413 D<sub>2</sub>O resistant mutants with the observed pleiotropic phenotypes, and although heavy metals,  
414 oxidizing agents and increased temperatures also induce multiple cellular effects [58-61], these  
415 conditions occur naturally and cells have therefore evolved specific transcriptional programs driving  
416 the expression of proteins that fend against such insults. Since the natural abundance of D<sub>2</sub>O is  
417 miniscule (<0.02% in water), any D<sub>2</sub>O resistant mutant must therefore be a consequence of some  
418 cellular pathway, which indirectly improves fitness in response to D<sub>2</sub>O. We identified a null mutant  
419 in *pmk1* (orthologue of human *MAPK7*) which displays increased tolerance to D<sub>2</sub>O. This is in line  
420 with Pmk1 acting as a MAP kinase that regulates cell wall biogenesis [44, 62, 63] and the observed  
421 D<sub>2</sub>O-induced cell wall and cell septation defects. Accordingly, the cell integrity pathway is activated  
422 in response to D<sub>2</sub>O, and when we selected for spontaneous D<sub>2</sub>O-tolerant strains, we recovered  
423 mutants in other components of the pathway. Moreover, we found that deletion of the Rho2 GAP,  
424 Rga7, which normally down-regulates the cell integrity pathway [43, 44], leads to a D<sub>2</sub>O  
425 hypersensitive phenotype. However, besides *rga7*Δ, other mutants that we scored as D<sub>2</sub>O sensitive  
426 have also been reported in BioGRID to display genetic interactions with components of the cell  
427 integrity pathway (supporting material file 3). Intriguingly, the D<sub>2</sub>O-dependent cell wall effects, we  
428 report here, resemble those observed upon deletion of the kinase Kin1, which regulates cell polarity  
429 [64, 65]. Similar to D<sub>2</sub>O treated cells, the *kin1*Δ strain displays positive genetic interactions with  
430 *pck2*Δ and *pmk1*Δ mutants [64].

431 Activation of the cell integrity pathway is in agreement with its role in mediating an appropriate  
432 response to allow survival during sudden changes in water activity [66] and earlier studies suggesting  
433 that D<sub>2</sub>O causes osmotic stress [67, 68]. It does, however, pose the question of how the solvent  
434 exchange, or what property of D<sub>2</sub>O, causes activation of the pathway? Several upstream membrane-  
435 spanning sensors of the cell integrity pathway, including Wsc1 and Mid2, have been identified in  
436 *Saccharomyces cerevisiae*. Recent studies suggest that these sensors physically couple the cell wall  
437 with the plasma membrane, and in a spring-like manner function to sense mechanical perturbations  
438 or elasticity changes in the cell wall and/or plasma membrane [69]. Accordingly, D<sub>2</sub>O is known to  
439 affect phospholipid membranes [70] and ion channels [68], and we speculate that this or related  
440 effects on the cell wall glycans may cause a direct activation of the cell integrity pathway.

441 Identifying D<sub>2</sub>O-resistant strains has important practical applications, since the phenotypes imposed  
442 by D<sub>2</sub>O severely hinder the production of deuterated proteins for structural studies [71], but also  
443 potentially for biological production of deuterated pharmaceuticals, which in some cases are superior  
444 to their protonated counterparts [72], and are therefore increasingly being considered as drug  
445 candidates [73-75]. Although bacteria can be adapted to grow in 100% D<sub>2</sub>O [17], growth is often  
446 poor and the bacteria quickly lose the D<sub>2</sub>O tolerance when returned to H<sub>2</sub>O media. The results  
447 presented here provide an important first step towards an understanding of how D<sub>2</sub>O affects cell  
448 biology and for generating D<sub>2</sub>O tolerant strains for production of deuterated biomolecules.

## 449 **Materials and Methods**

450

### 451 *Heavy water and deuterated glucose*

452 The used D<sub>2</sub>O (deuterium oxide) was purchased as 99.8% D<sub>2</sub>O/0.2% H<sub>2</sub>O (Sigma). Deuterated  
453 glucose (D-glucose-1,2,3,4,5,6,6-d<sub>7</sub>) was purchased as 97 atom % D (Sigma).

454

### 455 *Yeast strains and techniques*

456 The fission yeast strains that were used in this study are all derivatives of the wild type *972h* and  
457 *975h*<sup>+</sup> heterothallic strains that either carry no auxotrophic markers (no marker wild type), or the three  
458 auxotrophic markers *ura4-D18*, *leu1-32*, and *ade6-216* (3 marker wild type). The gene deletion  
459 strains were from the fission yeast haploid deletion library purchased from Bioneer [76]. The *LifeAct-*  
460 *GFP* and *atb2-GFP* strains have been described before [77, 78]. The *pck2-8* strain was kindly  
461 provided by Dr. Jeremy Hyams. The *pmk1-HA* strain was kindly provided by Dr. Marisa Madrid [47].  
462 Growth assays in liquid YES (yeast extract with supplements) media (5 g/L yeast extract, 30 g/L  
463 glucose, 225 mg/L adenine, 225 mg/L uracil, 225 mg/L leucine) were performed at 30 °C with  
464 vigorous shaking by following the optical density (OD) at 600 nm. Growth assays on solid media,  
465 either YES media (YES medium with 20 g/L agar) or EMM2 (Edinburgh minimal media) [79, 79]  
466 were performed at 25 or 30 °C essentially as described [80]. Sporulation assays were performed using  
467 malt extract agar plates (30 g/L malt extract, 20 g/L agar). For iodine staining, solid iodine was heated  
468 in a closed beaker and the plates briefly exposed to the iodine vapor. The wild type diploid strain was  
469 constructed by mating *ade6-210 h*<sup>+</sup> cells with *ade6-216 h*<sup>-</sup> cells on malt extract and selecting for cells  
470 that could grow in the absence of adenine.

471  $\beta$ -glucanase (Sigma) resistance was determined (in water) for cells grown for 25 hours in 100% D<sub>2</sub>O-  
472 based YES medium as described [81].

473 Cell viability was determined by staining cells using VitaBright-48 (ChemoMetec) and a  
474 NucleoCounter NC-3000 (ChemoMetec) as described by the manufacturer.

475 To monitor cell cycle progression, cultures treated or untreated with D<sub>2</sub>O, were stained with SYTOX  
476 Green and the cellular DNA content was quantified using a NucleoCounter NC-3000 (ChemoMetec)  
477 as described by the manufacturer.

478

#### 479 *Cell imaging and microscopy*

480 Calcofluor white (Sigma) staining was used to monitor cell septation as described previously [82].  
481 Hoechst (Sigma) staining was used to mark the nucleus. Cells were observed on 2 % agarose pads  
482 made in EMM with H<sub>2</sub>O or D<sub>2</sub>O. Samples were examined using a Zeiss Z1 AxioObserver inverted  
483 fluorescence microscope, equipped with a motorized stage, in a temperature-controlled incubation  
484 chamber. A 100x, 1.4 NA oil immersion lens and a Cool-Snap HQ2 CCD camera (Photometrics)  
485 controlled by Axiovision software (Zeiss) was used for image capture. All image analysis was  
486 performed using ImageJ [83]. Electron microscopy was performed essentially as described [84].

487

#### 488 *Hyperpolarized extract <sup>13</sup>C-NMR*

489 A previously published protocol [35] was followed for substrate incubation, metabolite extraction,  
490 and extract hyperpolarization. Briefly, 100 μL 120 mM U-<sup>13</sup>C, d<sub>7</sub> glucose dissolved in either D<sub>2</sub>O- or  
491 H<sub>2</sub>O-based morpholinoethanesulfonate (MES) buffer (50 mM MES, 100 mM NaCl, pH 5.5) was  
492 added to the yeast cells and the respective samples were incubated for 2 minutes or 10 minutes at 30  
493 °C after which the metabolism was stopped by addition of 400 μL perchloric acid and the soluble  
494 metabolites were extracted according to the protocol. The freeze-dried extracts were re-dissolved in  
495 a hyperpolarization matrix and polarized at 3.35 T and 1.4 °K. Hyperpolarized extracts were hereafter  
496 dissolved in 4 mL D<sub>2</sub>O or H<sub>2</sub>O based MES-buffer pH 5.5 and injected into a 5 mm NMR tube and a

497 single spectrum  $^{13}\text{C}$ -NMR was acquired on a 9.4 T Varian Inova spectrometer immediately with a 90  
498 degree pulse.

499 NMR spectra were analyzed with the MNova software. Metabolites were identified by reference to  
500 the human metabolome database [85].

501

#### 502 *RNA sequencing*

503 Total RNA was isolated using the hot phenol method [86] from cells that were either untreated or  
504 treated with 100% D<sub>2</sub>O for 5 or 24 hours. Conversion to cDNA and sequencing was performed by  
505 the Beijing Genome Institute using the Illumina sequencing as single-end with final read lengths of  
506 50 bp after demultiplexing. This produced 23.9-24.1 million reads per sample. The raw reads were  
507 aligned to the *S. pombe* genome using bwa mem (v0.7.12) with default settings giving an alignment  
508 rate of 98.4-98.7% for all 12 samples. Mapped reads were assigned to genes using GFOLD ('gfold  
509 count') followed by GFOLD statistical analysis ('gfold diff') to detect differentially expressed (DE)  
510 genes [87].

511 The significance cut-off for DE genes was set at  $\text{FDR} \leq 5\%$  and absolute  $\log_2$  fold change  $\geq 2$ . For  
512 figures the DESeq2 (R package) [88] normalized gene counts ('rld') were used. The *S. pombe*  
513 reference genome and gene annotation were downloaded from GenBank (date stamped 27-FEB-  
514 2015, Rel. 123, Last updated, Version 14). Supplementary data tables from Chen *et al.* (Chen et al.,  
515 2003) were downloaded from <http://128.40.79.33/projects/stress/>. The data from Vjestica *et al.* are  
516 primarily from the supplementary material (Vjestica et al., 2013).

517 Our annotation also includes rRNA, tRNA, ncRNA, snoRNA, and mitochondrial genes, that in many  
518 cases are not present in the older annotations used by Chen *et al.* (Chen et al., 2003) and Vjestica *et*  
519 *al.* (Vjestica et al., 2013). Thus, it was not possible to compare the expression levels of many, in

520 particular non-coding, genes across the studies. The DESeq2 Bioconductor package in R (Anders et  
521 al., 2015) was used for statistical analyses of differentially expressed genes.

522

### 523 *Screening the S. pombe deletion library*

524 The *S. pombe* haploid gene deletion library was first pinned to YES (0% D<sub>2</sub>O) agar plates in 384  
525 format. Once large colonies had formed, cells were transferred to YES with 0% D<sub>2</sub>O and YES with  
526 100% D<sub>2</sub>O agar plates in 384 format. After 8 days of incubation at 30 °C, the plates were  
527 photographed and cell growth was scored by manual inspection. All cell handling was performed  
528 using a ROTOR HDA pinning robot (Singer Instruments).

529

### 530 *Screening for spontaneous D<sub>2</sub>O-tolerant mutants and whole-genome sequencing*

531 Wild type cells were inoculated in 1 mL 100% D<sub>2</sub>O YES medium in separate tubes and incubated at  
532 30 °C. After about 1 week, when slight growth was apparent in some of the tubes, cells from each  
533 culture were spread on solid 100% D<sub>2</sub>O YES media plates and only one single large colony from each  
534 plate was selected for further analyses. Genomic DNA was purified by phenol-chloroform extraction  
535 as described [89]. The purified DNA from the three selected *hwr* mutants and the wild type parent  
536 was sequenced by the Beijing Genome Institute.

537 Illumina sequencing was applied using paired-end with final read lengths of 150 bp after  
538 demultiplexing and produced 78.4-87.5 million read pairs per sample, which leads to an average  
539 coverage >1000 reads per reference base.

540 The raw reads were trimmed using Trimmomatic (v0.32; default setting except: HEADCROP=10,  
541 SLIDINGWINDOW=4:30, MINLEN=30) [90]. The trimmed reads were aligned to the *S. pombe*  
542 genome (version ASM294v2.38) with 'bwa mem' (v0.7.15; default settings except: -M) [91] and the  
543 resulting alignments locally refined using Stampy (v1.0.32; default settings except: --sensitive--



544 bamkeepgoodreads -M) [92] for higher mapping sensitivity. With Picard tools (v4.0.1.1)  
545 (<http://broadinstitute.github.io/picard>) the alignments were coordinate sorted (sortSam) and read  
546 duplicates annotated (MarkDuplicates). The alignment rate was >99% for all four samples.  
547 To call variations (SNPs, insertions and deletions) between wild type cells and the three independent  
548 *hwr* mutants we used GATK LeftAlignIndels followed by GATK Mutect2 (v4.0.1.1; default settings  
549 except: -ploidy 1 -tumor <Mutant> -normal <Wild-type>) [93, 94]. The Mutect2 generated list of  
550 putative mutations were quality filtered with 'bcftools filter' (v1.3.1; settings: 'AF[0]>0.75').  
551 Mutations were also called on the alignment files using Freebayes (v1.2.0; default settings except: --  
552 ploidy 1 --min-alternate-count 5 --min-alternate-fraction 0.4) followed by quality filtering by 'bcftools  
553 filter' (settings: 'AO>200 && ODDS>100 && GL[\*]<-100 && AC=1') [95]. Mutect2 and Freebayes  
554 agree on the main findings. The mutations were annotated to genes (ENSEMBL, *S. pombe* version  
555 ASM294v2.38) using ANNOVAR (version: July 17 2017) [96]. Comparison to the reference genome  
556 revealed that our strains contained two mutations on chromosome II (A153954T and T153964A) in  
557 the *mali* gene encoding maltase alpha-glucosidase resulting in a variant of Mal1 containing an R131R  
558 silent and F135I missense substitution.  
559 Three mutations were selected for PCR validation, and multiple alignments in ClustalW comparing  
560 the annotated full length gene, the wild type PCR sequences and the *hwr* PCR sequences all verified  
561 the predicted mutations.  
562 PCR sequencing was performed by Eurofins. The used primers were: *mkl1* forward:  
563 GATAATGTGTATGACAATGACGC, *mkl1* reverse: GCATGTCGTAAAGATTCGTG, *pek1*  
564 forward: TGACGTCAAAAGGTCAAGTG, *pek1* reverse: CTAATCAGACCAGACTTGACG, *pck2*  
565 forward: AAGCCCAGATGGTCATG, *pck2* reverse: GGATGAGTCATGACATCTTCTG.

566

567 *Electrophoresis and blotting*

568 Whole cell lysates were prepared with TCA and glass beads as described [84]. Proteins were resolved  
569 by SDS-PAGE on 12% acrylamide gels and subsequently transferred to nitrocellulose membranes  
570 (0.2- $\mu$ m pore size, Advantec, Toyo Roshi Kaisha Ltd.). The blots were blocked in PBS (133 mM  
571 NaCl, 2.7 mM KCl, 6.5 mM Na<sub>2</sub>HPO<sub>4</sub>, and 1.5 mM KH<sub>2</sub>PO<sub>4</sub> (pH 7.4)) with 5% fat-free milk powder  
572 and 0.01% Tween 20. The antisera, diluted 1:1000, were as follows: anti-HA (clone 3F10, Roche),  
573 anti-P-p44/42 (Phospho-p44/42 MAPK #9101, Cell Signaling Technology), and anti- $\alpha$ -tubulin (clone  
574 TAT1, Abcam). Secondary HRP-conjugated antibodies were from Dako Cytomation. Blots were  
575 developed using the Pierce ECL Plus detection kit (Thermo Scientific).

576

577 **Acknowledgements**

578 The authors thank Dr. Marisa Madrid and Dr. Jeremy Hyams for sharing yeast strains, Dr. Shiraz  
579 Shah for help with the RNA sequencing and Dr. Genevieve Thon for help with screening the deletion  
580 library. In addition, we thank Mrs. Anne-Marie Lauridsen for expert technical assistance, and Dr.  
581 Kresten Lindorff-Larsen, Dr. Olaf Nielsen, Dr. Erik Boye, Dr. Michael A. Sørensen, Dr. Sofie V.  
582 Nielsen, and Dr. Martin Willemoës for helpful discussions and comments on the manuscript.

583

584 **Competing interests**

585 No competing interests declared.

586

587 **Author contributions**

588 C.K., C.H., M.K., S.K.G., M.H.L., I.J. conducted the experiments. C.K., C.H., I.J., M.K., M.H.L.,  
589 B.B.K., J.V.J., and R.H.P. analyzed the data. C.K., J.V.J., H.N.B., M.H.L., J.R.W. and R.H.P.  
590 designed the experiments. J.R.W. and R.H.P. conceived the study. C.K., J.R.W. and R.H.P. wrote the  
591 paper.

592

593 **Funding**

594 R.H.P. is supported by grants from the Lundbeck Foundation, the Novo Nordisk Foundation, the A.P.  
595 Møller Foundation, and the Danish Council for Independent Research (Technology and Production  
596 Sciences). R.H.P. and B.B.K. are supported by the Novo Nordisk Foundation REPIN programme.

597

598 **References**

- 599 1. Benner SA, Ricardo A, Carrigan MA. Is there a common chemical model for life in the universe? *Curr*  
600 *Opin Chem Biol.* 2004;8(6):672-89.
- 601 2. Zhang W, Needham DL, Coffin M, Rooker A, Hurban P, Tanzer MM, et al. Microarray analyses of  
602 the metabolic responses of *Saccharomyces cerevisiae* to organic solvent dimethyl sulfoxide. *J Ind*  
603 *Microbiol Biotechnol.* 2003;30(1):57-69.
- 604 3. Krumbiegel P. Large deuterium isotope effects and their use: a historical review. *Isotopes Environ*  
605 *Health Stud.* 2011;47(1):1-17.
- 606 4. Kresheck GC, Schneider H, Scheraga HA. The effect of D<sub>2</sub>O on the thermal stability of proteins.  
607 Thermodynamic parameters for the transfer of model compounds from H<sub>2</sub>O to D<sub>2</sub>O. *J Phys Chem.*  
608 1965;69(9):3132-44.
- 609 5. Kushner DJ, Baker A, Dunstall TG. Pharmacological uses and perspectives of heavy water and  
610 deuterated compounds. *Can J Physiol Pharmacol.* 1999;77(2):79-88.
- 611 6. Wallace SA, Mathur JN, Allen BJ. The influence of heavy water on boron requirements for neutron  
612 capture therapy. *Med Phys.* 1995;22(5):585-90.
- 613 7. Baum D, Dobbing J, Coward WA. Deuterium method for measuring milk intake in babies. *Lancet.*  
614 1979;2(8137):309.
- 615 8. Lifson N, Gordon GB, McClintock R. Measurement of total carbon dioxide production by means of  
616 D<sub>2</sub>O<sub>18</sub>. 1955. *Obes Res.* 1997;5(1):78-84.
- 617 9. Rodewald LE, Maiman LA, Foye HR, Borch RF, Forbes GB. Deuterium oxide as a tracer for  
618 measurement of compliance in pediatric clinical drug trials. *J Pediatr.* 1989;114(5):885-91.
- 619 10. Pittendrigh CS, Caldarola PC, Cosbey ES. A differential effect of heavy water on temperature-  
620 dependent and temperature-compensated aspects of circadian system of *Drosophila pseudoobscura*.  
621 *Proc Natl Acad Sci U S A.* 1973;70(7):2037-41.
- 622 11. Adams WH, Adams DG. Effects of deuteration on hematopoiesis in the mouse. *J Pharmacol Exp Ther.*  
623 1988;244(2):633-9.
- 624 12. Katz JJ, Crespi HL, Czajka DM, Finkel AJ. Course of deuteration and some physiological effects of  
625 deuterium in mice. *Am J Physiol.* 1962;203:907-13.
- 626 13. Gross PR, Spindel W. Mitotic arrest by deuterium oxide. *Science.* 1960;131:37-8.
- 627 14. Takahashi TC, Sato H. Effects of heavy water (D<sub>2</sub>O) on the length of the mitotic period in developing  
628 sea urchin eggs. *Cell Struct Funct.* 1983;8(4):357-65.
- 629 15. Lamprecht J, Schroeter D, Paweletz N. Mitosis arrested by deuterium oxide. Light microscopic,  
630 immunofluorescence and ultrastructural characterization. *Eur J Cell Biol.* 1990;51(2):303-12.
- 631 16. Lamprecht J, Schroeter D, Paweletz N. Derangement of microtubule arrays in interphase and mitotic  
632 PtK2 cells treated with deuterium oxide (heavy water). *J Cell Sci.* 1991;98 ( Pt 4):463-73.

- 633 17. Paliy O, Bloor D, Brockwell D, Gilbert P, Barber J. Improved methods of cultivation and production  
634 of deuteriated proteins from *E. coli* strains grown on fully deuteriated minimal medium. *J Appl*  
635 *Microbiol.* 2003;94(4):580-6.
- 636 18. Vanatalu K, Paalme T, Vilu R, Burkhardt N, Junemann R, May R, et al. Large-scale preparation of  
637 fully deuterated cell components. Ribosomes from *Escherichia coli* with high biological activity. *Eur*  
638 *J Biochem.* 1993;216(1):315-21.
- 639 19. Opitz C, Ahrne E, Goldie KN, Schmidt A, Grzesiek S. Deuterium induces a distinctive *Escherichia*  
640 *coli* proteome that correlates with the reduction in growth rate. *J Biol Chem.* 2019;294(7):2279-92.
- 641 20. Bartel B, Varshavsky A. Hypersensitivity to heavy water: a new conditional phenotype. *Cell.*  
642 1988;52(6):935-41.
- 643 21. Li X, Snyder MP. Yeast longevity promoted by reversing aging-associated decline in heavy isotope  
644 content. *NPJ Aging Mech Dis.* 2016;2:16004.
- 645 22. Izzo V, Fornili SL, Cordone L. Thermal denaturation of *B. subtilis* DNA in H<sub>2</sub>O and D<sub>2</sub>O observed  
646 by electron microscopy. *Nucleic Acids Res.* 1975;2(10):1805-10.
- 647 23. Cupane A, Vitrano E, San Biago PL, Madonia F, Palma MU. Thermal stability of poly(A) and poly(U)  
648 complexes in H<sub>2</sub>O and D<sub>2</sub>O: isotopic effects on critical temperatures and transition widths. *Nucleic*  
649 *Acids Res.* 1980;8(18):4283-303.
- 650 24. Hattori A, Crespi HL, Katz JJ. Effect of side-chain deuteration on protein stability. *Biochemistry.*  
651 1965;4(7):1213-25.
- 652 25. Makhatadze GI, Clore GM, Gronenborn AM. Solvent isotope effect and protein stability. *Nat Struct*  
653 *Biol.* 1995;2(10):852-5.
- 654 26. Chellgren BW, Creamer TP. Effects of H<sub>2</sub>O and D<sub>2</sub>O on polyproline II helical structure. *J Am Chem*  
655 *Soc.* 2004;126(45):14734-5.
- 656 27. Brown CR, Hong-Brown LQ, Biwersi J, Verkman AS, Welch WJ. Chemical chaperones correct the  
657 mutant phenotype of the delta F508 cystic fibrosis transmembrane conductance regulator protein. *Cell*  
658 *Stress Chaperones.* 1996;1(2):117-25.
- 659 28. Unno K, Okada S. Deuteration causes the decreased induction of heat-shock proteins and increased  
660 sensitivity to heat denaturation of proteins in *Chlorella*. *Plant Cell Physiol.* 1994;35(2):197-202.
- 661 29. Hoffman CS, Wood V, Fantes PA. An Ancient Yeast for Young Geneticists: A Primer on the  
662 *Schizosaccharomyces pombe* Model System. *Genetics.* 2015;201(2):403-23.
- 663 30. Perez P, Cortes JC, Martin-Garcia R, Ribas JC. Overview of fission yeast septation. *Cell Microbiol.*  
664 2016;18(9):1201-7.
- 665 31. Simanis V. Pombe's thirteen - control of fission yeast cell division by the septation initiation network.  
666 *J Cell Sci.* 2015;128(8):1465-74.
- 667 32. Marks J, Hagan IM, Hyams JS. Growth polarity and cytokinesis in fission yeast: the role of the  
668 cytoskeleton. *J Cell Sci Suppl.* 1986;5:229-41.

- 669 33. Hochuli M, Szyperski T, Wuthrich K. Deuterium isotope effects on the central carbon metabolism of  
670 Escherichia coli cells grown on a D<sub>2</sub>O-containing minimal medium. *J Biomol NMR*. 2000;17(1):33-  
671 42.
- 672 34. Ardenkjaer-Larsen JH, Fridlund B, Gram A, Hansson G, Hansson L, Lerche MH, et al. Increase in  
673 signal-to-noise ratio of > 10,000 times in liquid-state NMR. *Proc Natl Acad Sci U S A*.  
674 2003;100(18):10158-63.
- 675 35. Lerche MH, Yigit D, Frahm AB, Ardenkjaer-Larsen JH, Malinowski RM, Jensen PR. Stable Isotope-  
676 Resolved Analysis with Quantitative Dissolution Dynamic Nuclear Polarization. *Anal Chem*.  
677 2018;90(1):674-8.
- 678 36. Cordeiro AT, Godoi PH, Silva CH, Garratt RC, Oliva G, Thiemann OH. Crystal structure of human  
679 phosphoglucose isomerase and analysis of the initial catalytic steps. *Biochim Biophys Acta*.  
680 2003;1645(2):117-22.
- 681 37. Tsai CS, Ye HG, Shi JL. Carbon-13 NMR studies and purification of gluconate pathway enzymes  
682 from *Schizosaccharomyces pombe*. *Arch Biochem Biophys*. 1995;316(1):155-62.
- 683 38. Corkins ME, Wilson S, Cocuron JC, Alonso AP, Bird AJ. The gluconate shunt is an alternative route  
684 for directing glucose into the pentose phosphate pathway in fission yeast. *J Biol Chem*.  
685 2017;292(33):13823-32.
- 686 39. Junemann R, Wadzack J, Triana-Alonso FJ, Bittner JU, Caillet J, Meinnel T, et al. In vivo deuteration  
687 of transfer RNAs: overexpression and large-scale purification of deuterated specific tRNAs. *Nucleic  
688 Acids Res*. 1996;24(5):907-13.
- 689 40. Chatr-Aryamontri A, Oughtred R, Boucher L, Rust J, Chang C, Kolas NK, et al. The BioGRID  
690 interaction database: 2017 update. *Nucleic Acids Res*. 2017;45(D1):D369-D379.
- 691 41. Ma Y, Sugiura R, Koike A, Ebina H, Sio SO, Kuno T. Transient receptor potential (TRP) and Cchl-  
692 Yam8 channels play key roles in the regulation of cytoplasmic Ca<sup>2+</sup> in fission yeast. *PLoS One*.  
693 2011;6(7):e22421.
- 694 42. Deng L, Sugiura R, Takeuchi M, Suzuki M, Ebina H, Takami T, et al. Real-time monitoring of  
695 calcineurin activity in living cells: evidence for two distinct Ca<sup>2+</sup>-dependent pathways in fission yeast.  
696 *Mol Biol Cell*. 2006;17(11):4790-800.
- 697 43. Soto T, Villar-Tajadura MA, Madrid M, Vicente J, Gacto M, Perez P, et al. Rga4 modulates the activity  
698 of the fission yeast cell integrity MAPK pathway by acting as a Rho2 GTPase-activating protein. *J  
699 Biol Chem*. 2010;285(15):11516-25.
- 700 44. Villar-Tajadura MA, Coll PM, Madrid M, Cansado J, Santos B, Perez P. Rga2 is a Rho2 GAP that  
701 regulates morphogenesis and cell integrity in *S. pombe*. *Mol Microbiol*. 2008;70(4):867-81.
- 702 45. Ryan CJ, Roguev A, Patrick K, Xu J, Jahari H, Tong Z, et al. Hierarchical modularity and the evolution  
703 of genetic interactomes across species. *Mol Cell*. 2012;46(5):691-704.
- 704 46. Madrid M, Jimenez R, Sanchez-Mir L, Soto T, Franco A, Vicente-Soler J, et al. Multiple layers of  
705 regulation influence cell integrity control by the PKC ortholog Pck2 in fission yeast. *J Cell Sci*.  
706 2015;128(2):266-80.

- 707 47. Madrid M, Vazquez-Marin B, Soto T, Franco A, Gomez-Gil E, Vicente-Soler J, et al. Differential  
708 functional regulation of protein kinase C (PKC) orthologs in fission yeast. *J Biol Chem.*  
709 2017;292(27):11374-87.
- 710 48. Levin DE. Regulation of cell wall biogenesis in *Saccharomyces cerevisiae*: the cell wall integrity  
711 signaling pathway. *Genetics.* 2011;189(4):1145-75.
- 712 49. Sheu SY, Schlag EW, Selzle HL, Yang DY. Molecular dynamics of hydrogen bonds in protein-D2O:  
713 the solvent isotope effect. *J Phys Chem A.* 2008;112(5):797-802.
- 714 50. Lopez MM, Makhatadze GI. Solvent isotope effect on thermodynamics of hydration. *Biophys Chem.*  
715 1998;74(2):117-25.
- 716 51. Das DK, Mondal T, Mandal U, Bhattacharyya K. Probing deuterium isotope effect on structure and  
717 solvation dynamics of human serum albumin. *Chemphyschem.* 2011;12(4):814-22.
- 718 52. Efimova YM, Haemers S, Wierczynski B, Norde W, van Well AA. Stability of globular proteins in  
719 H<sub>2</sub>O and D<sub>2</sub>O. *Biopolymers.* 2007;85(3):264-73.
- 720 53. Krantz BA, Moran LB, Kentsis A, Sosnick TR. D/H amide kinetic isotope effects reveal when  
721 hydrogen bonds form during protein folding. *Nat Struct Biol.* 2000;7(1):62-71.
- 722 54. Krantz BA, Srivastava AK, Nauli S, Baker D, Sauer RT, Sosnick TR. Understanding protein hydrogen  
723 bond formation with kinetic H/D amide isotope effects. *Nat Struct Biol.* 2002;9(6):458-63.
- 724 55. Unno K, Kishido T, Morioka M, Okada S, Oku N. Increased expression of Hsp70 for resistance to  
725 deuterium oxide in a yeast mutant cell line. *Biol Pharm Bull.* 2003;26(6):799-802.
- 726 56. Whipple JM, Lane EA, Chernyakov I, D'Silva S, Phizicky EM. The yeast rapid tRNA decay pathway  
727 primarily monitors the structural integrity of the acceptor and T-stems of mature tRNA. *Genes Dev.*  
728 2011;25(11):1173-84.
- 729 57. Svenningsen SL, Kongstad M, Stenum TS, Munoz-Gomez AJ, Sorensen MA. Transfer RNA is highly  
730 unstable during early amino acid starvation in *Escherichia coli*. *Nucleic Acids Res.* 2017;45(2):793-  
731 804.
- 732 58. Estruch F. Stress-controlled transcription factors, stress-induced genes and stress tolerance in budding  
733 yeast. *FEMS Microbiol Rev.* 2000;24(4):469-86.
- 734 59. Herrero E, Ros J, Belli G, Cabiscol E. Redox control and oxidative stress in yeast cells. *Biochim*  
735 *Biophys Acta.* 2008;1780(11):1217-35.
- 736 60. Chen D, Toone WM, Mata J, Lyne R, Burns G, Kivinen K, et al. Global transcriptional responses of  
737 fission yeast to environmental stress. *Mol Biol Cell.* 2003;14(1):214-29.
- 738 61. Kriegenburg F, Poulsen EG, Koch A, Kruger E, Hartmann-Petersen R. Redox control of the ubiquitin-  
739 proteasome system: from molecular mechanisms to functional significance. *Antioxid Redox Signal.*  
740 2011;15(8):2265-99.
- 741 62. Zaitsevskaya-Carter T, Cooper JA. Spm1, a stress-activated MAP kinase that regulates morphogenesis  
742 in *S.pombe*. *EMBO J.* 1997;16(6):1318-31.

- 743 63. Toda T, Dhut S, Superti-Furga G, Gotoh Y, Nishida E, Sugiura R, et al. The fission yeast *pmk1+* gene  
744 encodes a novel mitogen-activated protein kinase homolog which regulates cell integrity and functions  
745 coordinately with the protein kinase C pathway. *Mol Cell Biol.* 1996;16(12):6752-64.
- 746 64. Cadou A, Couturier A, Le GC, Soto T, Miklos I, Sipiczki M, et al. Kin1 is a plasma membrane-  
747 associated kinase that regulates the cell surface in fission yeast. *Mol Microbiol.* 2010;77(5):1186-202.
- 748 65. Lee ME, Rusin SF, Jenkins N, Kettenbach AN, Moseley JB. Mechanisms Connecting the Conserved  
749 Protein Kinases Ssp1, Kin1, and Pom1 in Fission Yeast Cell Polarity and Division. *Curr Biol.*  
750 2018;28(1):84-92.
- 751 66. Hohmann S. Osmotic stress signaling and osmoadaptation in yeasts. *Microbiol Mol Biol Rev.*  
752 2002;66(2):300-72.
- 753 67. Brooks SC. Osmotic effects of deuterium oxide (heavy water) on living cells. *Science.*  
754 1937;86(2239):497-8.
- 755 68. Andjus PR, Kataev AA, Alexandrov AA, Vucelic D, Berestovsky GN. D2O-induced ion channel  
756 activation in Characeae at low ionic strength. *J Membr Biol.* 1994;142(1):43-53.
- 757 69. Kock C, Dufrene YF, Heinisch JJ. Up against the wall: is yeast cell wall integrity ensured by  
758 mechanosensing in plasma membrane microdomains? *Appl Environ Microbiol.* 2015;81(3):806-11.
- 759 70. Beranova L, Humpolickova J, Sykora J, Benda A, Cwiklik L, Jurkiewicz P, et al. Effect of heavy water  
760 on phospholipid membranes: experimental confirmation of molecular dynamics simulations. *Phys  
761 Chem Chem Phys.* 2012;14(42):14516-22.
- 762 71. Gardner KH, Kay LE. The use of <sup>2</sup>H, <sup>13</sup>C, <sup>15</sup>N multidimensional NMR to study the structure and  
763 dynamics of proteins. *Annu Rev Biophys Biomol Struct.* 1998;27:357-406.
- 764 72. Claassen DO, Carroll B, De Boer LM, Wu E, Ayyagari R, Gandhi S, et al. Indirect tolerability  
765 comparison of Deutetrabenazine and Tetrabenazine for Huntington disease. *J Clin Mov Disord.*  
766 2017;4:3.
- 767 73. Mullard A. Deuterated drugs draw heavier backing. *Nat Rev Drug Discov.* 2016;15(4):219-21.
- 768 74. Timmins GS. Deuterated drugs; updates and obviousness analysis. *Expert Opin Ther Pat.*  
769 2017;27(12):1353-61.
- 770 75. Schmidt C. First deuterated drug approved. *Nat Biotechnol.* 2017;35(6):493-4.
- 771 76. Kim DU, Hayles J, Kim D, Wood V, Park HO, Won M, et al. Analysis of a genome-wide set of gene  
772 deletions in the fission yeast *Schizosaccharomyces pombe*. *Nat Biotechnol.* 2010;28(6):617-23.
- 773 77. Huang J, Huang Y, Yu H, Subramanian D, Padmanabhan A, Thadani R, et al. Nonmedially assembled  
774 F-actin cables incorporate into the actomyosin ring in fission yeast. *J Cell Biol.* 2012;199(5):831-47.
- 775 78. Sato M, Toya M, Toda T. Visualization of fluorescence-tagged proteins in fission yeast: the analysis  
776 of mitotic spindle dynamics using GFP-tubulin under the native promoter. *Methods Mol Biol.*  
777 2009;545:185-203.
- 778 79. Petersen J, Russell P. Growth and the Environment of *Schizosaccharomyces pombe*. *Cold Spring Harb  
779 Protoc.* 2016;2016(3):db.



- 780 80. Andersen KM, Jensen C, Kriegenburg F, Lauridsen AM, Gordon C, Hartmann-Petersen R. Tx11 and  
781 Txc1 are co-factors of the 26S proteasome in fission yeast. *Antioxid Redox Signal*. 2011;14(9):1601-  
782 8.
- 783 81. Graub R, Hilti N, Niederberger C, Schweingruber ME. Ksg1, a homologue of the phosphoinositide-  
784 dependent protein kinase 1, controls cell wall integrity in *Schizosaccharomyces pombe*. *J Basic*  
785 *Microbiol*. 2003;43(6):473-82.
- 786 82. Jourdain I, Dooley HC, Toda T. Fission yeast sec3 bridges the exocyst complex to the actin  
787 cytoskeleton. *Traffic*. 2012;13(11):1481-95.
- 788 83. Schindelin J, Arganda-Carreras I, Frise E, Kaynig V, Longair M, Pietzsch T, et al. Fiji: an open-source  
789 platform for biological-image analysis. *Nat Methods*. 2012;9(7):676-82.
- 790 84. Kampmeyer C, Karakostova A, Schenstrom SM, Abildgaard AB, Lauridsen AM, Jourdain I, et al. The  
791 exocyst subunit Sec3 is regulated by a protein quality control pathway. *J Biol Chem*.  
792 2017;292(37):15240-53.
- 793 85. Wishart DS, Feunang YD, Marcu A, Guo AC, Liang K, Vazquez-Fresno R, et al. HMDB 4.0: the  
794 human metabolome database for 2018. *Nucleic Acids Res*. 2018;46(D1):D608-D617.
- 795 86. Lyne R, Burns G, Mata J, Penkett CJ, Rustici G, Chen D, et al. Whole-genome microarrays of fission  
796 yeast: characteristics, accuracy, reproducibility, and processing of array data. *BMC Genomics*.  
797 2003;4(1):27.
- 798 87. Feng J, Meyer CA, Wang Q, Liu JS, Shirley L, X, Zhang Y. GFOLD: a generalized fold change for  
799 ranking differentially expressed genes from RNA-seq data. *Bioinformatics*. 2012;28(21):2782-8.
- 800 88. Love MI, Huber W, Anders S. Moderated estimation of fold change and dispersion for RNA-seq data  
801 with DESeq2. *Genome Biol*. 2014;15(12):550.
- 802 89. Marinova IN, Engelbrecht J, Ewald A, Langholm LL, Holmberg C, Kragelund BB, et al. Single site  
803 suppressors of a fission yeast temperature-sensitive mutant in *cdc48* identified by whole genome  
804 sequencing. *PLoS One*. 2015;10(2):e0117779.
- 805 90. Bolger AM, Lohse M, Usadel B. Trimmomatic: a flexible trimmer for Illumina sequence data.  
806 *Bioinformatics*. 2014;30(15):2114-20.
- 807 91. Li H, Durbin R. Fast and accurate long-read alignment with Burrows-Wheeler transform.  
808 *Bioinformatics*. 2010;26(5):589-95.
- 809 92. Lunter G, Goodson M. Stampy: a statistical algorithm for sensitive and fast mapping of Illumina  
810 sequence reads. *Genome Res*. 2011;21(6):936-9.
- 811 93. McKenna A, Hanna M, Banks E, Sivachenko A, Cibulskis K, Kernytsky A, et al. The Genome  
812 Analysis Toolkit: a MapReduce framework for analyzing next-generation DNA sequencing data.  
813 *Genome Res*. 2010;20(9):1297-303.
- 814 94. Cibulskis K, Lawrence MS, Carter SL, Sivachenko A, Jaffe D, Sougnez C, et al. Sensitive detection  
815 of somatic point mutations in impure and heterogeneous cancer samples. *Nat Biotechnol*.  
816 2013;31(3):213-9.

- 817 95. Garrison E, Marth G. Haplotype-based variant detection from short-read sequencing. arXiv.  
818 2012;1207.3907.
- 819 96. Wang K, Li M, Hakonarson H. ANNOVAR: functional annotation of genetic variants from high-  
820 throughput sequencing data. *Nucleic Acids Res.* 2010;38(16):e164.
- 821 97. Vjestica A, Zhang D, Liu J, Oliferenko S. Hsp70-Hsp40 chaperone complex functions in controlling  
822 polarized growth by repressing Hsf1-driven heat stress-associated transcription. *PLoS Genet.*  
823 2013;9(10):e1003886.
- 824 98. Poulsen EG, Kampmeyer C, Kriegenburg F, Johansen JV, Hofmann K, Holmberg C, et al. UBL/BAG-  
825 domain co-chaperones cause cellular stress upon overexpression through constitutive activation of  
826 Hsf1. *Cell Stress Chaperones.* 2017;22(1):143-54.  
827  
828

**Table 1**

| <i>Gene deletions scored as D<sub>2</sub>O hypersensitive in high-throughput screen</i> |               |                                                                        |
|-----------------------------------------------------------------------------------------|---------------|------------------------------------------------------------------------|
| Systematic ID                                                                           | Gene name     | Function                                                               |
| <i>SPAC13G7.03</i>                                                                      | <i>upf3</i>   | up-frameshift suppressor 3 family protein                              |
| <i>SPBC1539.08</i>                                                                      | <i>arf6</i>   | ADP-ribosylation factor, Arf family Arf6                               |
| <i>SPAC2F3.02</i>                                                                       | -             | ER protein translocation subcomplex subunit                            |
| <i>SPAC328.01c</i>                                                                      | <i>msn5</i>   | karyopherin/importin beta family nuclear import/export signal receptor |
| <i>SPAPB2B4.02</i>                                                                      | <i>grx5</i>   | mitochondrial [2Fe-2S] cluster assembly & transfer glutaredoxin Grx5   |
| <i>SPAC4D7.03</i>                                                                       | <i>pop2</i>   | F-box/WD repeat protein Pop2                                           |
| <i>SPCC970.10c</i>                                                                      | <i>brl2</i>   | ubiquitin-protein ligase E3 Brl2                                       |
| <i>SPBC18H10.06c</i>                                                                    | <i>swd2</i>   | Set1C complex subunit                                                  |
| <i>SPBC19C7.02</i>                                                                      | <i>ubr1</i>   | N-end-recognizing protein E3 Ubr1                                      |
| <i>SPAC17H9.10c</i>                                                                     | <i>ddb1</i>   | Cul4-RING E3 adaptor Ddb1                                              |
| <i>SPAC26H5.05</i>                                                                      | <i>mga2</i>   | IPT/TIG ankyrin repeat transcription regulator of fatty acid synthesis |
| <i>SPBC106.10</i>                                                                       | <i>pka1</i>   | cAMP-dependent protein kinase catalytic subunit Pka1                   |
| <i>SPAC6F6.01</i>                                                                       | <i>cch1</i>   | plasma membrane calcium ion import channel Cch1                        |
| <i>SPAC3H8.02</i>                                                                       | <i>csr102</i> | Sec14 family, phospholipid-intermembrane transfer protein Csr102       |
| <i>SPBC13G1.08c</i>                                                                     | <i>ash2</i>   | Ash2-trithorax family protein                                          |
| <i>SPCP1E11.06</i>                                                                      | <i>apl4</i>   | AP-1 adaptor complex gamma subunit Apl4                                |
| <i>SPAC10F6.13c</i>                                                                     | <i>caa1</i>   | cytoplasmic aspartate aminotransferase Caa1                            |
| <i>SPBC23G7.08c</i>                                                                     | <i>rga7</i>   | RhoGAP, GTPase activating protein Rga7                                 |
| <i>SPBC27B12.08</i>                                                                     | <i>sip1</i>   | Pof6 interacting protein Sip1, AP-1 accessory protein                  |
| <i>SPBC21C3.20c</i>                                                                     | <i>git1</i>   | C2 domain protein Git1                                                 |
| <i>SPAC806.07</i>                                                                       | <i>ndk1</i>   | nucleoside diphosphate kinase Ndk1                                     |
| <i>SPAC644.06c</i>                                                                      | <i>cdr1</i>   | NIM1 family serine/threonine protein kinase Cdr1/Nim1                  |
| <i>SPBC16E9.13</i>                                                                      | <i>ksp1</i>   | serine/threonine protein kinase Ksp1                                   |
| <i>SPCC1739.14</i>                                                                      | <i>npp106</i> | nucleoporin Npp106                                                     |
| <i>SPAC7D4.06c</i>                                                                      | <i>alg3</i>   | dolichol-P-Man-dependent alpha(1-3) mannosyltransferase Alg3           |
| <i>SPBC3B9.11c</i>                                                                      | <i>ctf1</i>   | mRNA cleavage and polyadenylation specificity factor subunit Ctf1      |
| <i>SPAC2F7.07c</i>                                                                      | <i>cph2</i>   | Clr6 histone deacetylase associated PHD protein Cph2                   |
| <i>SPBC16E9.08</i>                                                                      | <i>mcp4</i>   | prospore membrane protein Mcp4/Mug101                                  |
| <i>SPAC926.03</i>                                                                       | <i>rlc1</i>   | myosin II regulatory light chain Rlc1                                  |
| <i>SPBC13G1.03c</i>                                                                     | <i>pex14</i>  | peroxisomal docking protein Pex14                                      |
| <i>SPBC776.15c</i>                                                                      | <i>kdg2</i>   | dihydrolipoamide S-succinyltransferase Kdg2                            |
| <i>SPAC513.03</i>                                                                       | <i>mfm2</i>   | M-factor precursor Mfm2                                                |
| <i>SPAC26F1.04c</i>                                                                     | <i>etr1*</i>  | enoyl-[acyl-carrier protein] reductase                                 |
| <i>SPBP8B7.11</i>                                                                       | <i>nxt3</i>   | ubiquitin protease cofactor Nxt3                                       |
| <i>SPAC12B10.12c</i>                                                                    | <i>rhp41</i>  | DNA repair protein Rhp41                                               |
| <i>SPCC777.10c</i>                                                                      | <i>ubc12</i>  | NEDD8-conjugating enzyme Ubc12                                         |
| <i>SPAC4H3.13</i>                                                                       | <i>pcc1</i>   | EKC/KEOPS complex subunit Pcc1                                         |
| <i>SPAC5D6.05</i>                                                                       | <i>med18</i>  | mediator complex subunit Med18                                         |
| <i>SPCC970.06</i>                                                                       | <i>erv29</i>  | COP II adaptor Erv29                                                   |

829 \*: Upregulated in RNA seq. at 24 hours in D<sub>2</sub>O.

830

**Table 2**

*Mutect2 predicted genome sequence differences in the hwr strains*

| Mutant        | Chr.* | Nucleotide change*   | Location | Gene                | Type             |
|---------------|-------|----------------------|----------|---------------------|------------------|
| <i>hwr1-1</i> | II    | A4313777del          | exon     | <i>pek1</i>         | frameshift       |
| <i>hwr1-1</i> | III   | G2337547A            | exon     | <i>trm72</i>        | missense (G253E) |
| <i>hwr2-1</i> | I     | 613724CTATGTTCAAGins | exon     | <i>mkh1</i>         | frameshift       |
| <i>hwr2-1</i> | I     | 1670566Tins          | splicing | <i>gta2</i>         | -                |
| <i>hwr2-1</i> | I     | T5448804del          | 5' UTR   | <i>SPAC1039.02#</i> | -                |
| <i>hwr3-1</i> | I     | G3273325C            | ncRNA    | <i>SPNCRNA.899</i>  | -                |
| <i>hwr3-1</i> | II    | C2310230T            | exon     | <i>pck2</i>         | missense (G870S) |

831 \*: Chr.: chromosome, del: deletion, ins: insertion; #: Downregulated in RNA seq. after 5 hours in D<sub>2</sub>O.

832

833

834 **Figure legends**

835

836 **Figure 1 – *D*<sub>2</sub>O inhibits cell growth.**

837 (A) Cell growth of wild type (no marker) *S. pombe* cells in rich medium was followed by measuring  
838 the turbidity of the culture at the indicated concentrations of D<sub>2</sub>O. The error bars indicate the standard  
839 deviation (n=3). (B) From growth experiments as shown in (A), the doubling time of wild type *S.*  
840 *pombe* cells in exponential phase was determined at the indicated concentrations of D<sub>2</sub>O. The error  
841 bars indicate the standard deviation (n=3). (C) A close up of the growth curves shown in (A) during  
842 the first three hours of culturing at the indicated concentrations of D<sub>2</sub>O. Note that the growth  
843 retardation caused by D<sub>2</sub>O occurs rapidly. The error bars indicate the standard deviation (n=3). (D)  
844 The viability of wild type cells grown at 0% and 100% D<sub>2</sub>O was determined by VitaBright staining  
845 and quantified by automated fluorescence microscopy. The error bars indicate the standard deviation  
846 (n=3). (E) The growth of wild type cells, pre-incubated for 5 hours at 0, 50, 75 or 100% D<sub>2</sub>O in liquid  
847 YES media, was compared by serial diluting and spotting onto solid rich media agar plates with the  
848 indicated concentrations of D<sub>2</sub>O at 30 °C. (F) The growth of wild type cells was compared on media  
849 prepared with D<sub>2</sub>O or H<sub>2</sub>O with either hydrogenated glucose (Glu (H)) or deuterated glucose (Glu  
850 (D)) by serial diluting and spotting onto solid rich media or synthetic minimal media agar plates at  
851 30 °C.

852

853 **Figure 2 – *D*<sub>2</sub>O affects cell morphology and causes cell septation defects.**

854 (A) Wild type cells grown at 0% and 100% D<sub>2</sub>O for the indicated times were stained with calcofluor  
855 (to mark the septa) and Hoechst (to mark the nucleus) and analyzed by microscopy. Note that the  
856 thickness of the septa is increased in the presence of D<sub>2</sub>O. Bar = 5 μm. (B) The percentages of septated  
857 cells (septation index) and of septated cells with multiple septa were determined after 5 and 24 hours  
858 at the indicated concentrations of D<sub>2</sub>O. The error bars indicate the standard deviation (n=4). (C)  
859 Transmission electron microscopy images of wild type cells after 24 hours in 0% or 100% D<sub>2</sub>O YES  
860 medium. Note the irregular septa and thickening of the cell wall (black arrow head). Bar = 5 μm. (D)  
861 Transmission electron microscopy images of wild type cells after 24 hours in 0% or 100% D<sub>2</sub>O YES  
862 medium as in panel A. Bar = 5 μm. (E) Cell lysis of wild type (no marker) cells grown at the indicated  
863 D<sub>2</sub>O concentrations for 24 hours was recorded over time by measuring turbidity of cultures treated  
864 with β-glucanase (in water). The error bars indicate the standard deviation (n=4).

865

866 **Figure 3 – *D*<sub>2</sub>O inhibits glucose metabolism.**

867 (A) Hyperpolarized <sup>13</sup>C NMR spectrum of cellular metabolite extract following incubation with the  
868 isotope labelled glucose tracer for 10 minutes in D<sub>2</sub>O buffer (red spectrum) and H<sub>2</sub>O buffer (black  
869 spectrum). Red insert shows a zoom-in on the carbonyl region showing gluconate (GA) and 6-  
870 phosphogluconate (6PGA). The asterisk marks an unidentified metabolite. Blue insert shows a zoom-  
871 in on the aliphatic sugar region, revealing a multiplet centred at 61.2 ppm originating from 6-<sup>13</sup>C-  
872 glucose. The multiplet at 62.8 ppm originates from the α-form of glucose-6-phosphate (α-G6P) in the  
873 spectrum from the D<sub>2</sub>O experiments (red) and from the β-form of glucose-6-phosphate (β-G6P) in

874 the spectrum from the H<sub>2</sub>O experiments (black). (B) Quantitative difference between accumulated  
875 glucose-6-phosphate (G6P) signal in D<sub>2</sub>O and H<sub>2</sub>O exposed cells following incubation with <sup>13</sup>C<sub>6</sub>-d<sub>7</sub>-  
876 labelled glucose for 10 minutes. The error bars indicate the standard deviation (n=4). (C) Glucose  
877 metabolic pathways when *S. pombe* cells are exposed to D<sub>2</sub>O and H<sub>2</sub>O. Metabolites identified in panel  
878 A are highlighted in red. Glucose in its β-form is in both D<sub>2</sub>O and H<sub>2</sub>O buffers converted into  
879 gluconate (GA) and further into 6-phosphogluconate (6PGA) in the pentose phosphate pathway  
880 (PPP). In D<sub>2</sub>O, the α-form of glucose-6-phosphate (α-G6P) is accumulating whereas the β-form is  
881 metabolized more rapidly. Contrary, in H<sub>2</sub>O, no accumulation of α-G6P can be detected. An  
882 explanation for this difference is an altered activity of glucose-6-phosphate isomerase (GPI, EC  
883 5.3.1.9) when the cells are exposed to D<sub>2</sub>O. This enzyme catalyzes the isomerization reactions  
884 between α-G6P and β-G6P, α-G6P and β-F6P, and β-G6P and β-F6P (blue reactions).  
885

886 **Figure 4 – RNA sequencing of cells treated with D<sub>2</sub>O.**

887 (A) Total RNA was sequenced from wild type (no marker) cells that were either untreated (0% D<sub>2</sub>O)  
888 or treated with 100% D<sub>2</sub>O for 5 or 24 hours in quadruplicates. Heatmap showing hierarchical  
889 clustering on the Euclidian distances between full set of gene counts for all samples (after DESeq2's  
890 own log transformation and variance stabilization). (B) Plot showing the first two principal  
891 components from a principal component analysis (PCA) on the full set of gene counts. (C) Heatmap  
892 of CESR genes as defined by Chen *et al.* for D<sub>2</sub>O regulated genes, *mas5Δ*, *ssa2Δ*, heat shock [97],  
893 *sty1Δ*, *atf1Δ* [60], and *bag101* overexpression (OE) [98]. The combined datasets were quantile  
894 normalized to make them comparable. Color key including value frequency is shown next to the  
895 heatmap. Note that the D<sub>2</sub>O response resembles the heat stress, *mas5Δ*, *ssa2Δ* and *bag101* OE  
896 response, but not that in the other strains. (D) Plot showing the first two principal components from  
897 a principal component analysis (PCA) on the same data shown in (C). (E) The growth at 30 °C of wild  
898 type (no marker) cells that were either untreated (control) or subjected to a 30 minute heat shock at  
899 43 °C was compared in the presence of the indicated concentrations of D<sub>2</sub>O by serial diluting and  
900 spotting onto solid rich media. (F) The growth at 30 °C of wild type cells that were either untreated  
901 (control) or exposed to 0.07 mM H<sub>2</sub>O<sub>2</sub> for 1 hour, was compared in the presence of the indicated  
902 concentrations of D<sub>2</sub>O by serial diluting and spotting onto solid rich media. (G) Wild type cells that  
903 were either untreated (control) or subjected to 5 hours incubation in rich medium containing 100%  
904 D<sub>2</sub>O were challenged with the indicated heat shock conditions prior to spotting onto solid rich media  
905 at 30 °C. (H) The growth of wild type cells that were either untreated (control) or subjected to 5 hours  
906 incubation in rich medium containing 100% D<sub>2</sub>O was compared in the presence of the indicated  
907 concentrations of H<sub>2</sub>O<sub>2</sub> by serial diluting and spotting onto solid rich media at 30 °C.  
908

909 **Figure 5 – D<sub>2</sub>O sensitive and D<sub>2</sub>O resistant *S. pombe* mutants.**

910 (A) The growth of a 3 marker wild type strain and the otherwise isogenic *caalΔ* were compared in  
911 the presence of the indicated concentrations of D<sub>2</sub>O by serial diluting and spotting onto solid rich  
912 media at 30 °C. (B) The growth of a 3 marker wild type strain and the otherwise isogenic deletion  
913 mutants were compared in the presence of the indicated concentrations of D<sub>2</sub>O by serial diluting and  
914 spotting onto solid rich media at 30 °C. (C) Schematic representation of pairwise genetic or physical

915 interactions listed in the BioGRID database (version 3.4.164) between the deleted genes/proteins in  
916 the isolated D<sub>2</sub>O hypersensitive strains (grey) and D<sub>2</sub>O tolerant strain (Pmk1, black).

917

918 **Figure 6 – D<sub>2</sub>O activates the cell integrity pathway.**

919 (A) The growth of 3 marker wild type cells and the isolated *hwr* mutants was compared by serial  
920 diluting and spotting onto solid rich media agar plates. (B) The cell integrity pathway in *S. pombe*  
921 cells as described by Madrid *et al.* [47]. The pathway is known to be activated by salt stress or cell  
922 wall damaging agents (red arrows), and consists of small GTPases that activate Pck1 and Pck2. In  
923 turn, this leads to activation of Mkh1, Pek1 and finally of the MAPK Pmk1 which ultimately triggers  
924 increased cell wall synthesis. Rga7 functions as a Rho2 GAP that limits signaling [43]. The signaling  
925 components identified with mutations in the *hwr* strains are shown in green. The D<sub>2</sub>O hypersensitive  
926 phenotype observed for the *rga7*Δ strain is shown in red. (C) The growth of 3 marker wild type cells  
927 and the indicated mutants in the cell integrity pathway was compared by serial diluting and spotting  
928 onto solid rich media agar plates at 25 °C. (D) Wild type cells (3 marker) at 100% D<sub>2</sub>O for 24 hours  
929 were stained with calcofluor and analyzed by microscopy. Bar = 5 μm. (E) Whole cell lysates of wild  
930 type cells expressing HA-tagged Pmk1 were analyzed by SDS-PAGE and Western blotting using  
931 antibodies to phosphorylated Pmk1 (P-p44/42), the HA-tag on Pmk1 and, as a loading control, to α-  
932 tubulin. Note that the level of phosphorylated Pmk1 is increased in response to D<sub>2</sub>O.

933

Figure 1

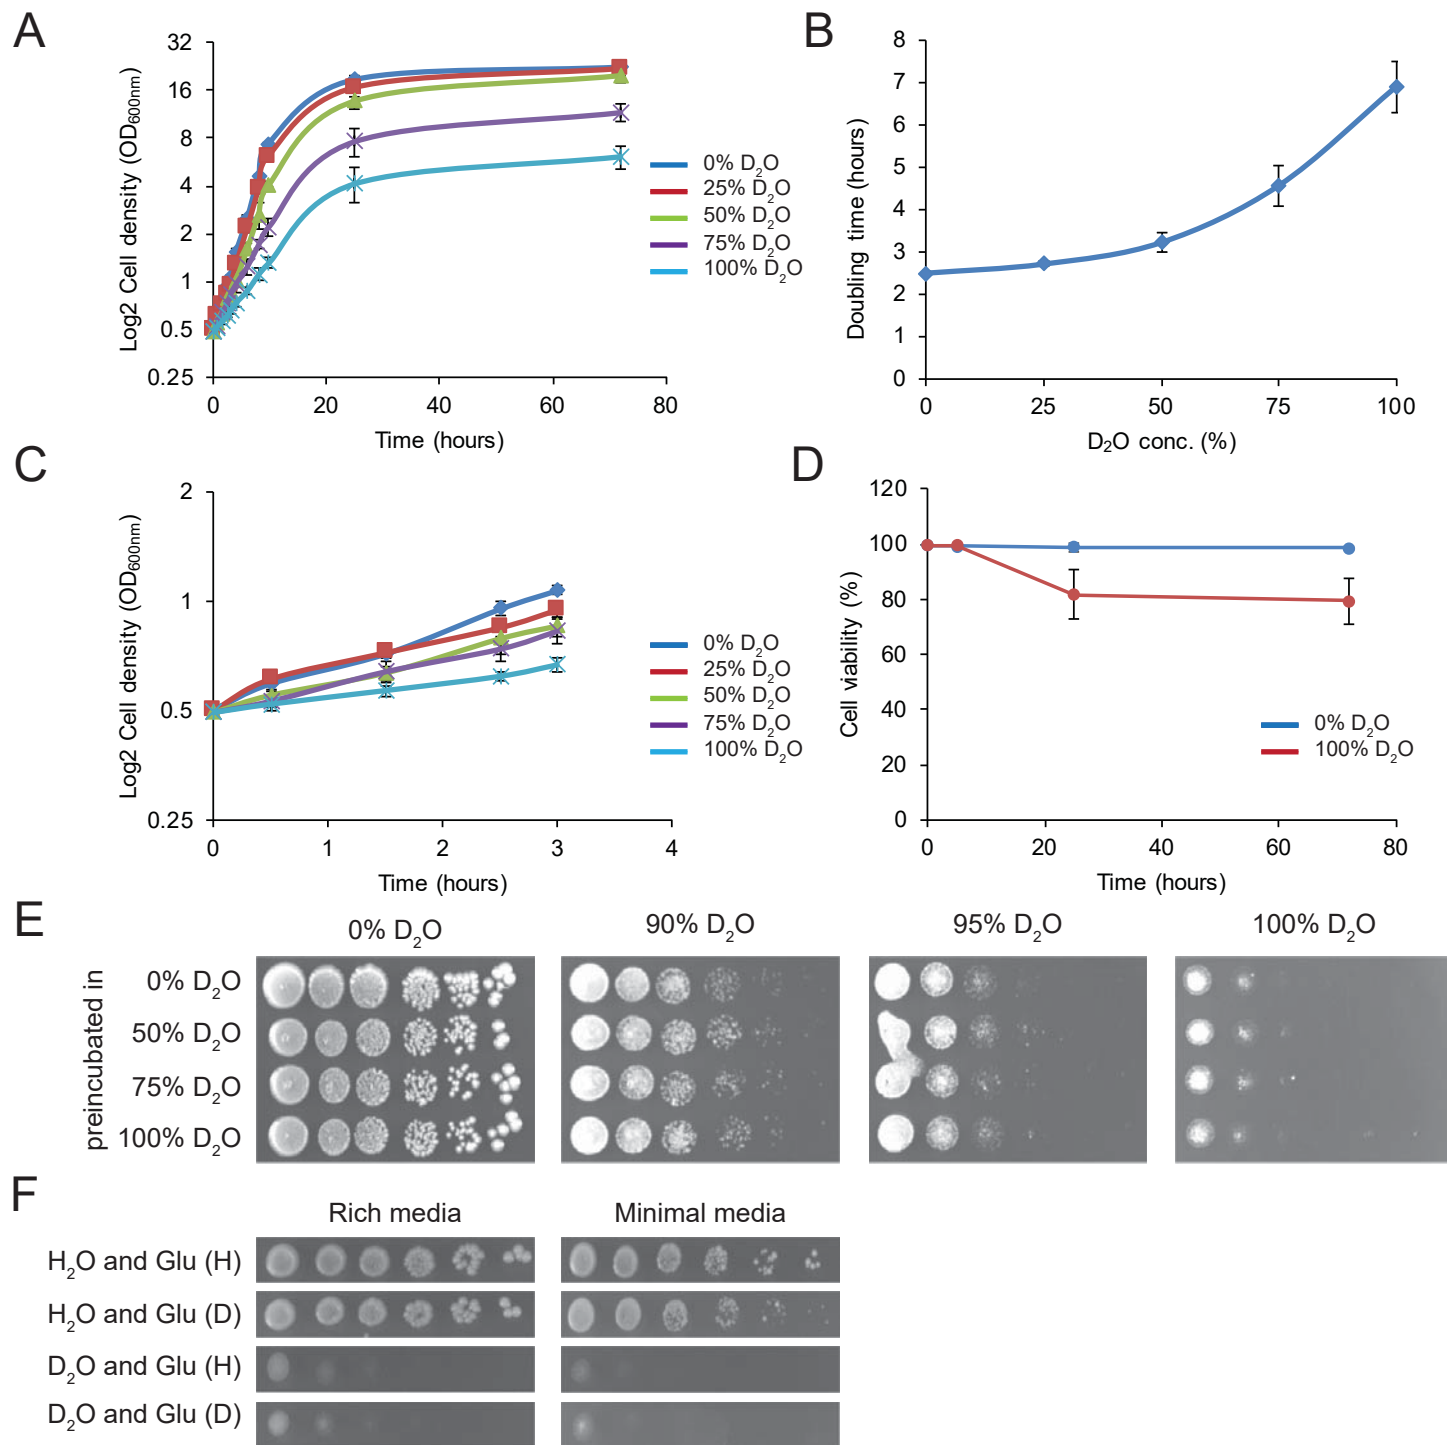



Figure 2

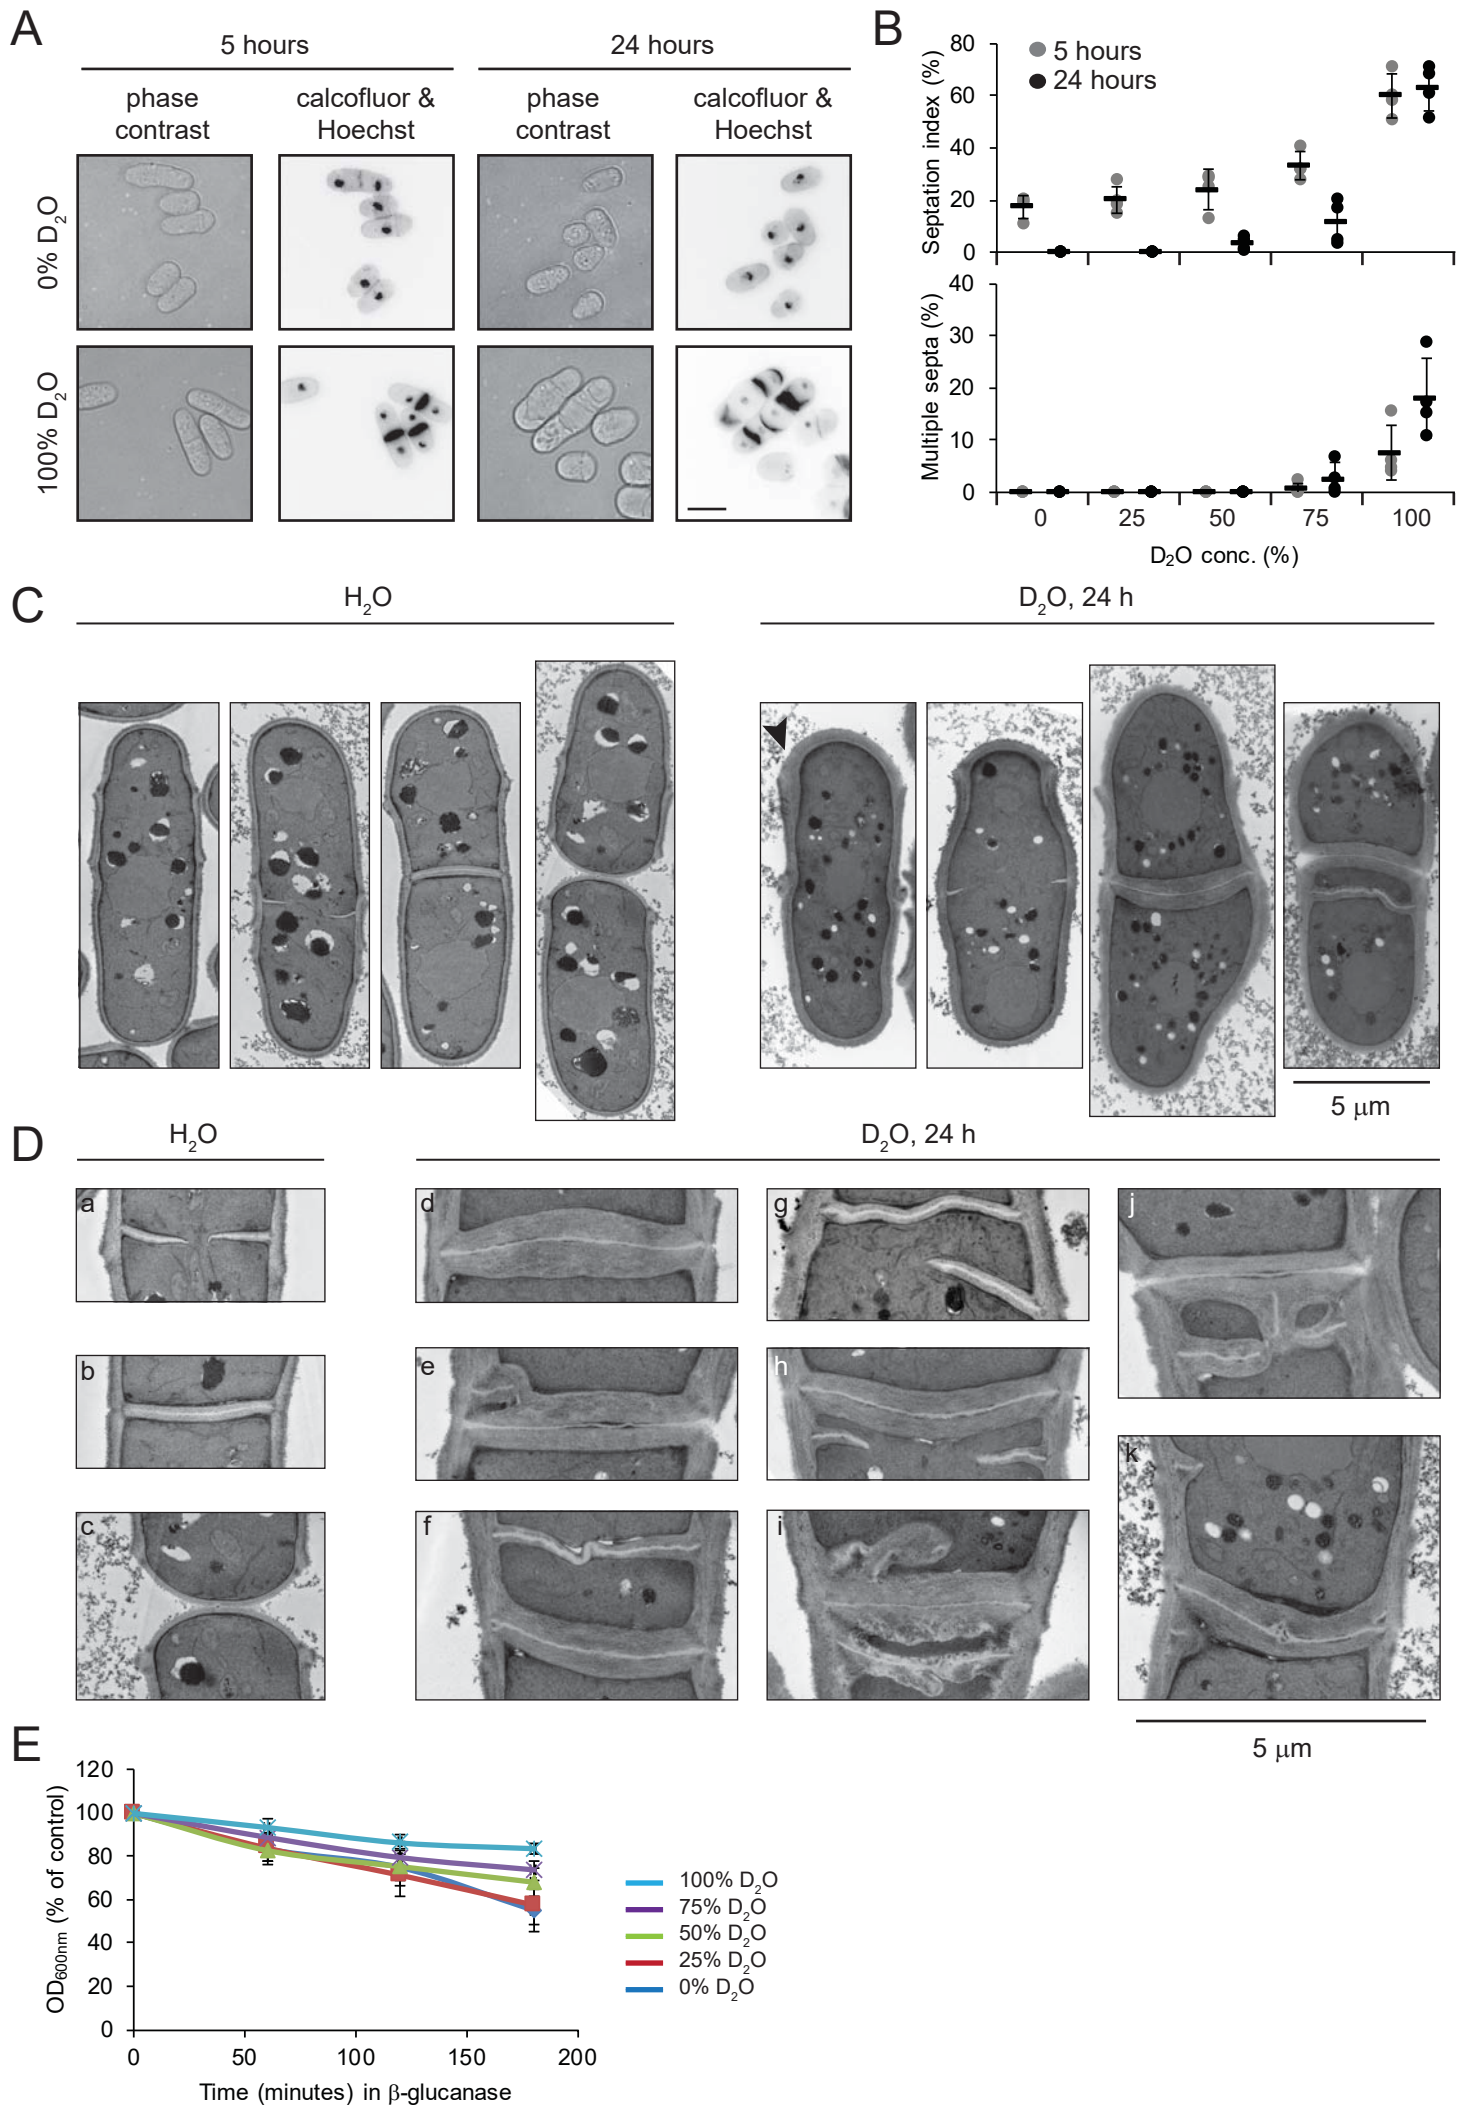

Figure 3

A

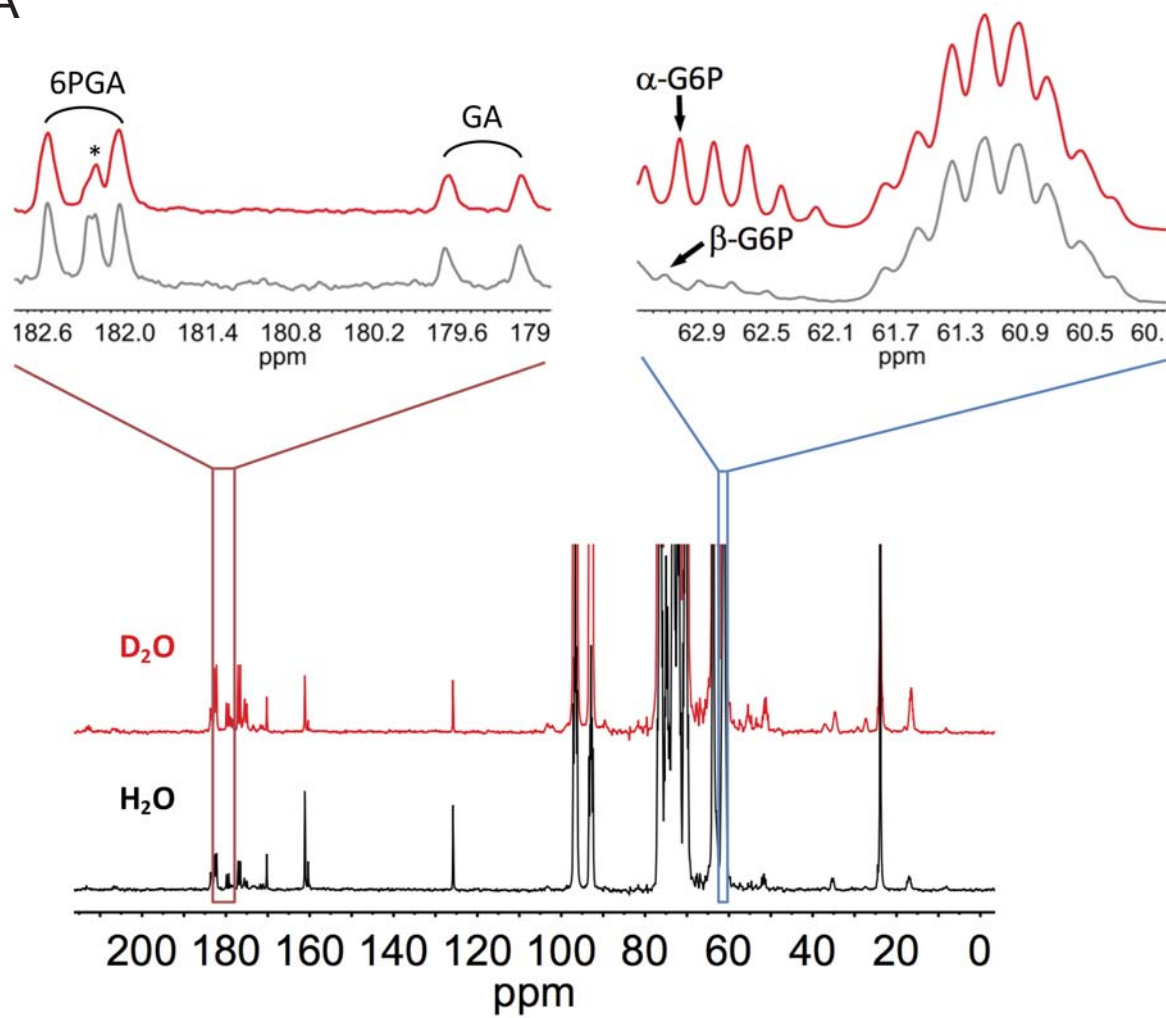

B

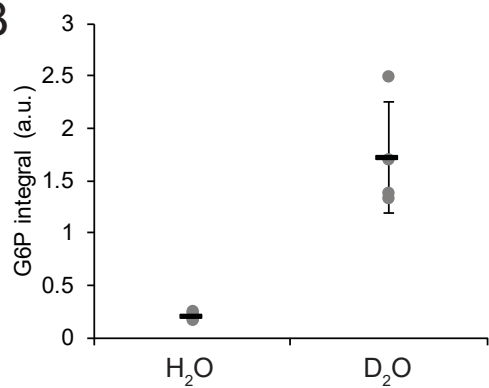

C

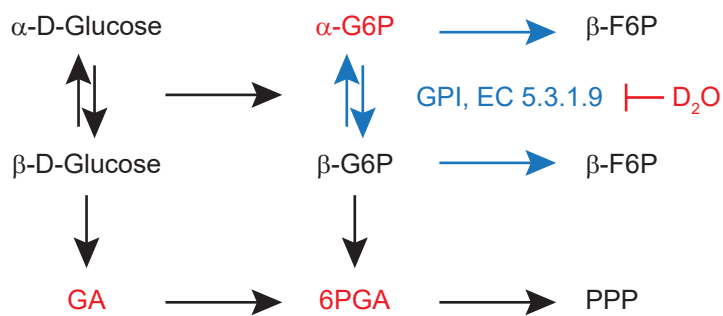

Figure 4

A

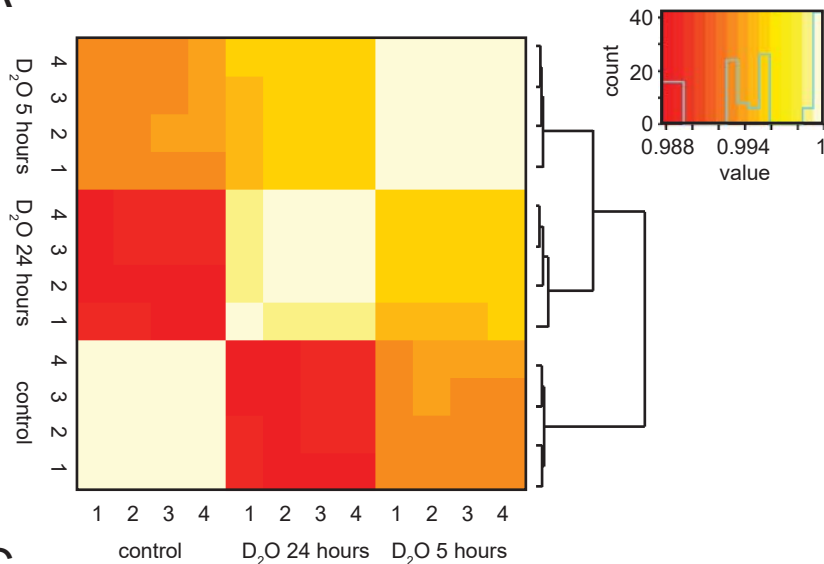

B

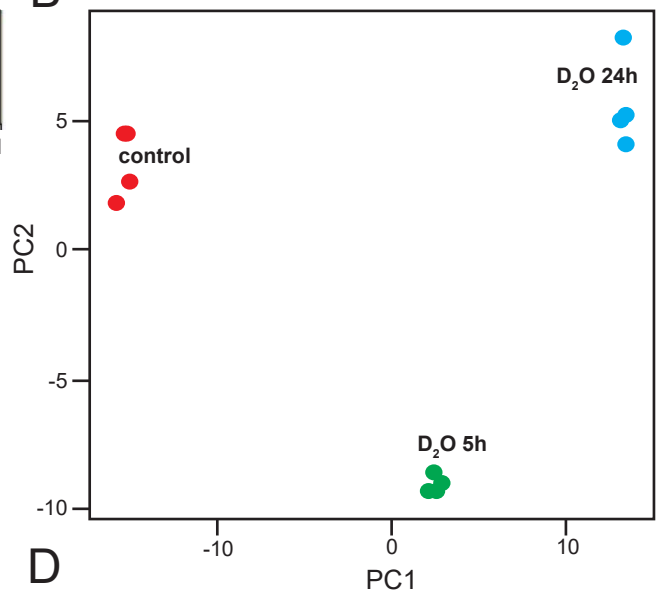

C

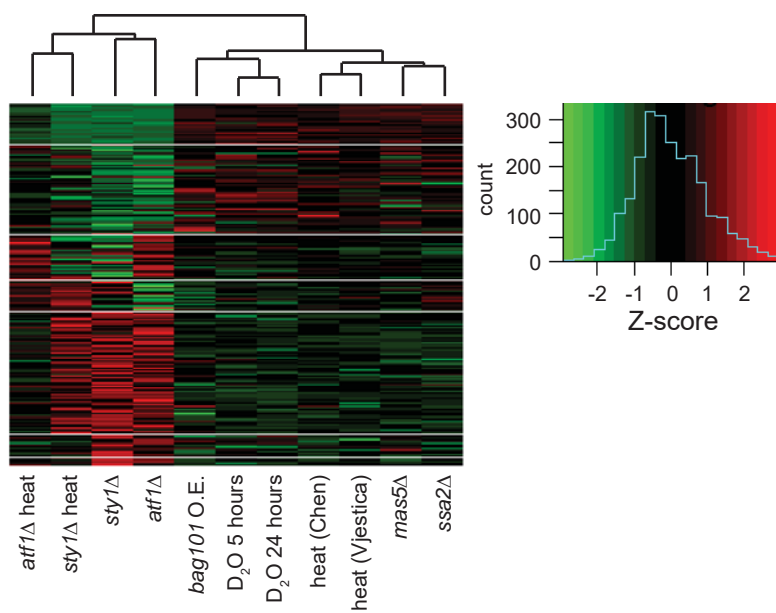

D

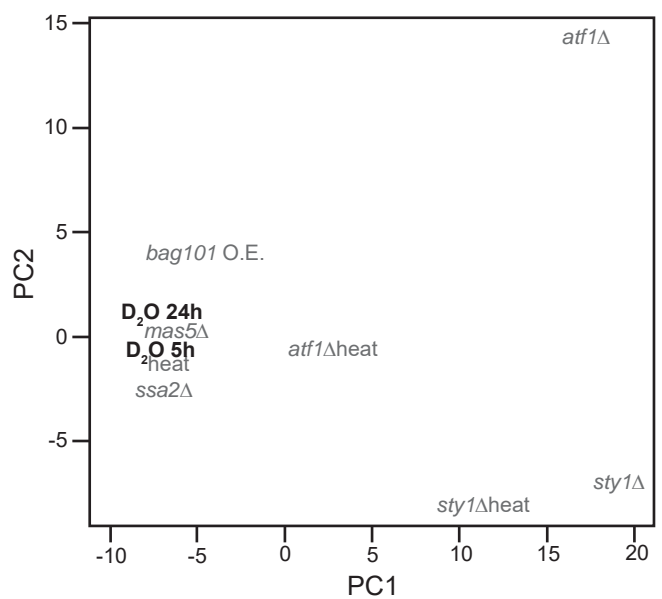

E

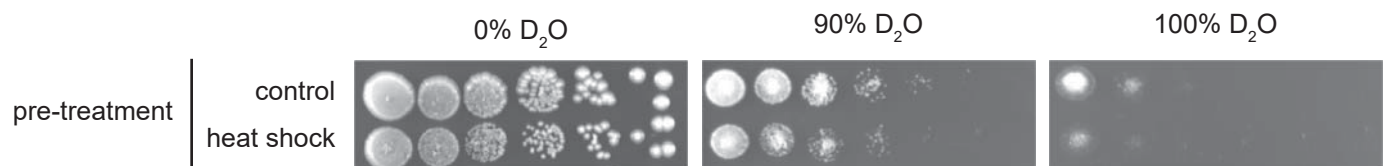

F

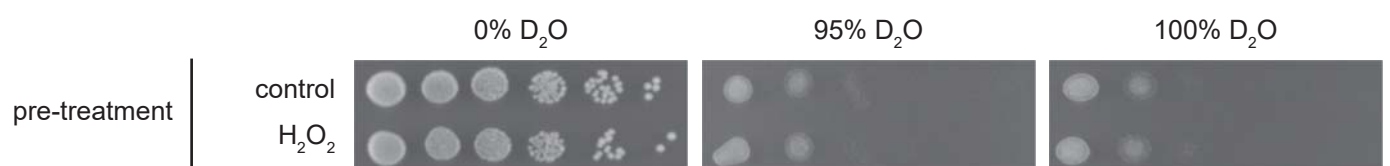

G

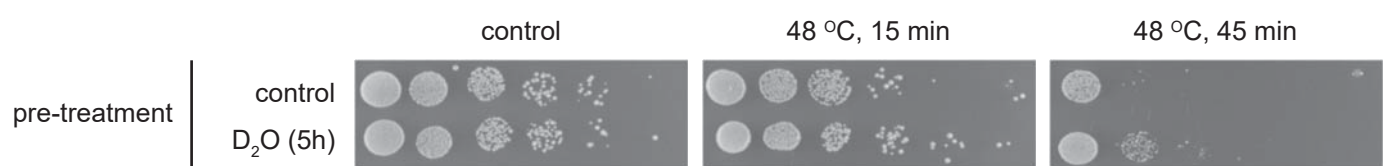

H

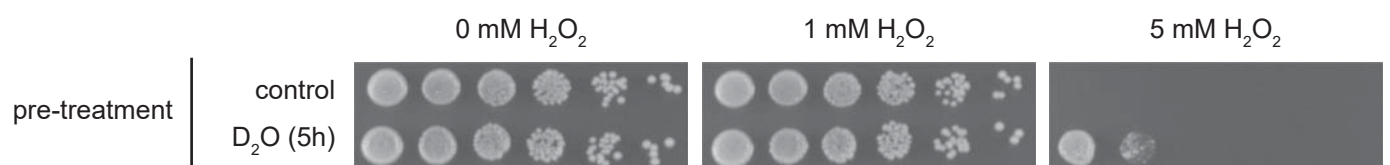

Figure 3

A

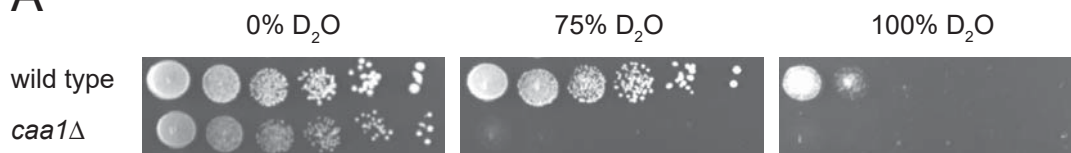

B

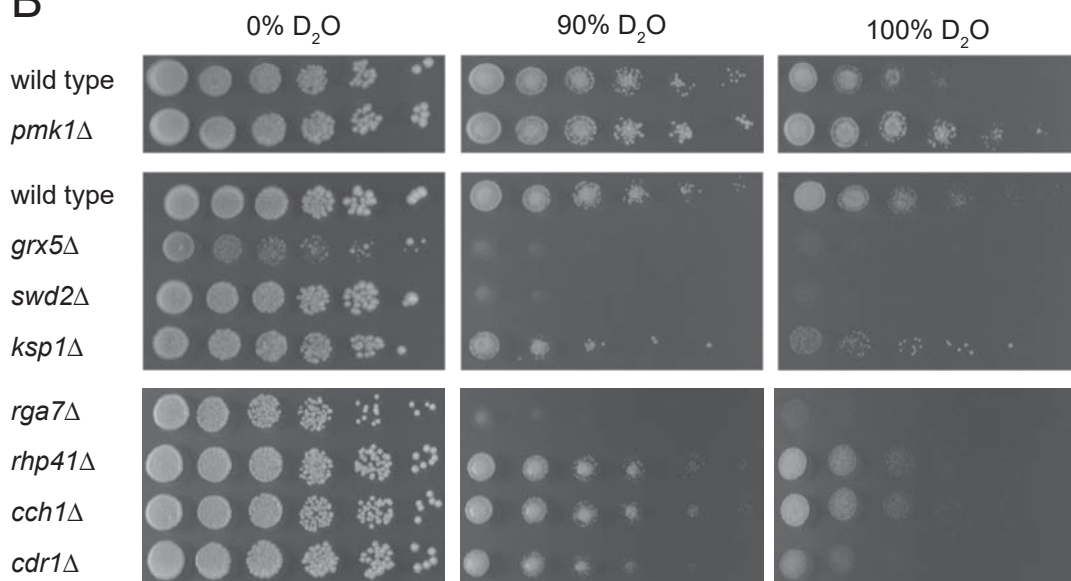

C

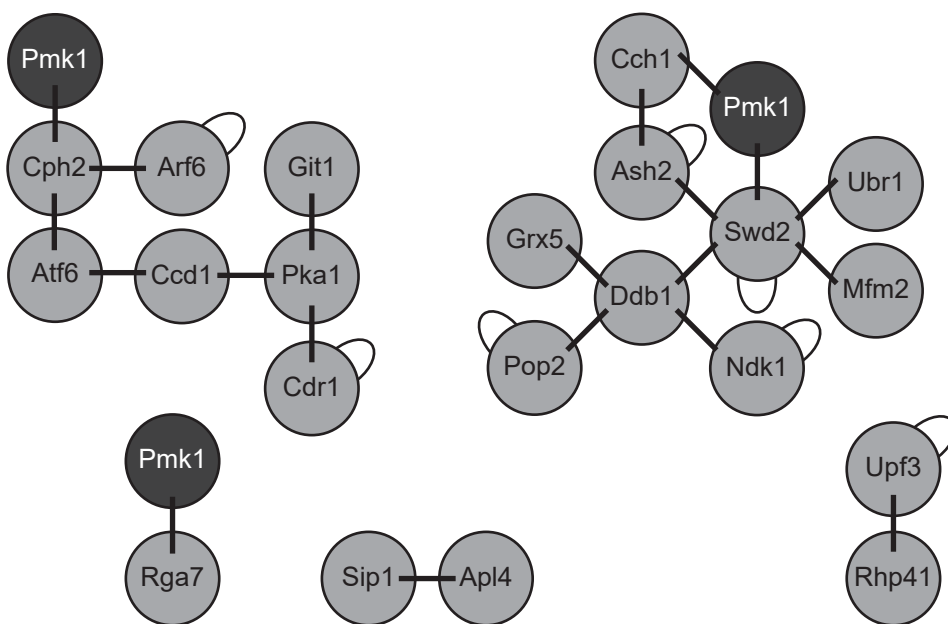

Figure 6

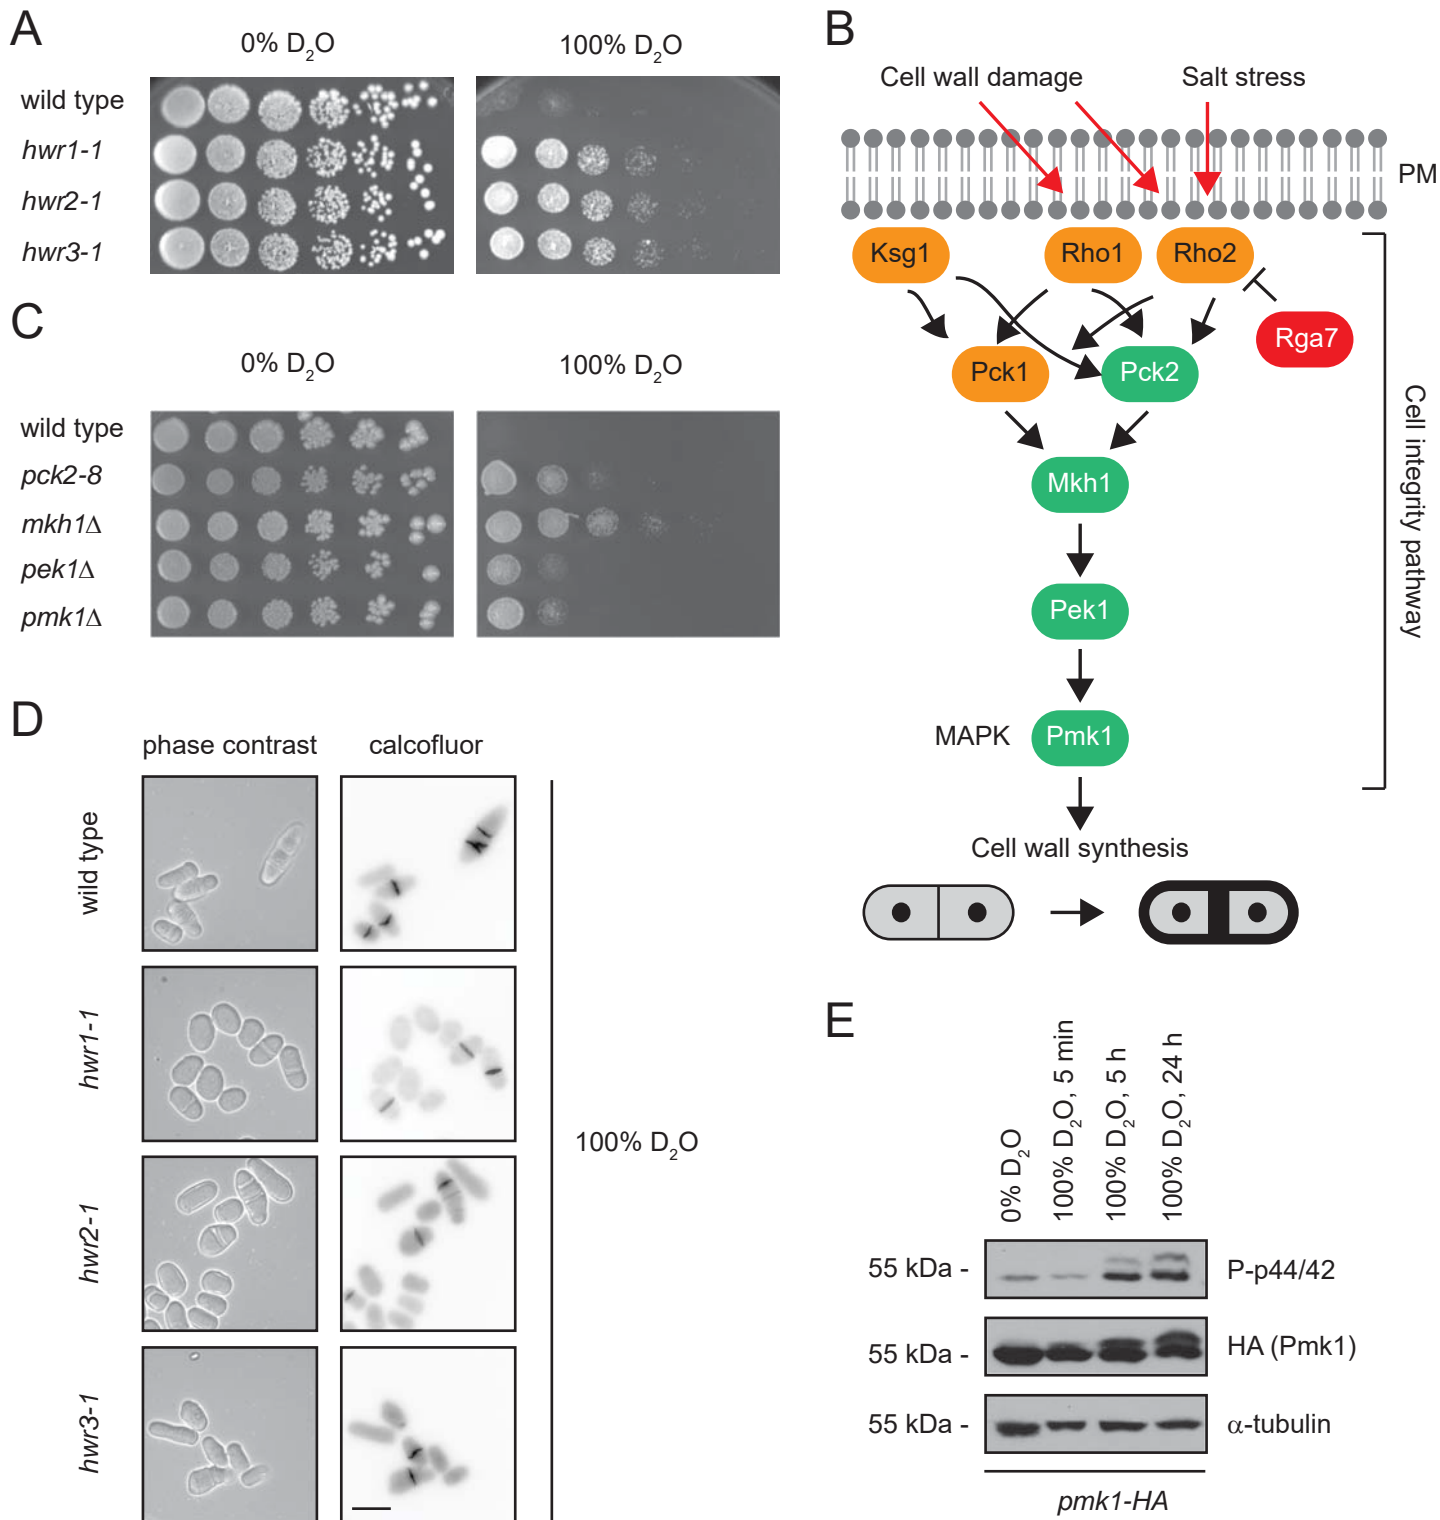

Source: https://www.biorxiv.org/content/10.1101/692889v1.full.pdf
